# Supplementary material for: Overview of Bat and Wildlife Coronavirus Surveillance in Africa: A Framework for Global Investigations
Source: MDPI journal article supplement (doi:10.3390/v13050936), 2021-05-18

| Table S1: Study overviews     |                                                                         |                                                                                                                      |                                                                                                                                                                                                                                    |                                                                                                                                                                                                      |                                               |                                                                                                                                           |
|-------------------------------|-------------------------------------------------------------------------|----------------------------------------------------------------------------------------------------------------------|------------------------------------------------------------------------------------------------------------------------------------------------------------------------------------------------------------------------------------|------------------------------------------------------------------------------------------------------------------------------------------------------------------------------------------------------|-----------------------------------------------|-------------------------------------------------------------------------------------------------------------------------------------------|
| Report                        | Country:                                                                | Time frame of samples collected:                                                                                     | Type of study and sampling strategy (opportunistic/ archival/ systematic/ repeated sampling):                                                                                                                                      | Sample types collected (collection storage method): *dry = not in a storage or transport buffer                                                                                                      | Sample types shown positive for coronaviruses | Destructive (vouchers collected) or non-destructive (catch-and release) sampling:                                                         |
| Tong et al. 2009 [26]         | Kenya                                                                   | July-August 2006                                                                                                     | Sampling of 17 identified roosts over 2 months among the southern regions of Kenya; sampling not repeated in the study duration.                                                                                                   | Fecal swabs, oral swabs; blood; tissues (collected dry with cold-chain)                                                                                                                              | Fecal swabs                                   | Destructive; euthanized all bats                                                                                                          |
| Pfefferle et al. 2009 [37]    | Ghana                                                                   | February 2008                                                                                                        | Surveillance of bats present at 4 sites near a lake habitat, rural area and university. Diverse insectivorous bats was targeted, and a large urban roosting site of frugivorous bats. Sampling not repeated in the study duration. | Fecal material from individual bats and fecal samples collected with plastic foil under trees occupied by Eidolon helvum bats (1–4 fecal pellets or swabs suspended in RNAlater, Applied Biosystems) | Fecal material                                | Non-destructive                                                                                                                           |
| Quan et al. 2010 [41]         | Nigeria                                                                 | June 2008                                                                                                            | Sampling of bats roosting in caves around human dwellings, that are frequented by people; sampling not repeated in the study duration.                                                                                             | Gastrointestinal tract specimens (collected dry with cold-chain)                                                                                                                                     | Gastrointestinal tract specimens              | Destructive                                                                                                                               |
| Geldenhuys et al. 2013 [42]   | South Africa                                                            | 2005-2011 (archival- 7 years)                                                                                        | Opportunistic testing of appropriate sample types in an archival biobank for initial surveillance of bats previously collected to determine if coronaviruses were present.                                                         | Fecal material and rectal specimens (archival)                                                                                                                                                       | Fecal material and rectal specimens           | Combination - samples were available and not specifically collected for this surveillance, though bats were entered in museum collections |
| Ithete et al. 2013 [43]       | South Africa                                                            | 2010-2012                                                                                                            | Sampling of 4 known roosts among the western and eastern coastal regions of South Africa; not specified if or how many times repeated sampling at same locations                                                                   | Fecal material (suspended in RNAlater, Life Technologies)                                                                                                                                            | Fecal material                                | Combination; bats were entered in museum collections                                                                                      |
| Annan et al. 2013 [44]        | Ghana (also surveyed in Germany, the Netherlands, Romania, and Ukraine) | 2009-2011                                                                                                            | Sampling of selected species as a second surveillance study in Ghana. A total of 7 locations were surveyed across southern regions of the country. Not specified if or how many times repeated sampling at same locations.         | Fecal material (suspended in RNAlater Stabilization Reagent, Qiagen)                                                                                                                                 | Fecal material                                | Non-destructive                                                                                                                           |
| Maganga et al. 2014 [45]      | Republic of Congo, Gabon, Central African Republic (CAR) and Senegal    | 2005-2008; Republic of Congo (2005 and 2006); Gabon (2005, 2006, 2009 and 2010); CAR (2008 and 2009); Senegal (2006) | Sampling aimed to investigate determinants affecting viral richness in bats sampled in Central and West Africa. Bats were sampled at multiple locations, at once-off sampling (no repeat sampling of the same localities).         | Collected organs (not specified)                                                                                                                                                                     | Intestine, lung                               | Destructive                                                                                                                               |
| Corman et al. 2015 [46]       | Ghana                                                                   | 2009-2011                                                                                                            | Sampling building on the collection from Annan et al. 2013; Focused surveillance for viruses related to human coronavirus 229E, with characterization of full genomes.                                                             | Fecal material in RNAlater (suspended in RNAlater Stabilization Reagent, Qiagen)                                                                                                                     | Fecal material                                | Non-destructive                                                                                                                           |
| Razanajatovo et al. 2015 [47] | Madagascar                                                              | 2007-2011                                                                                                            | Sampling at 8 sites in Madagascar, in known accessible roosts (trees and caves) where bats are frequently hunted as bushmeat. Some sites sampled more than once.                                                                   | Rectal and throat swabs in viral transport media (unspecified)                                                                                                                                       | Rectal swabs                                  | Non-destructive                                                                                                                           |

|                            |                                                                                                                                                                                                                                                                           |                                               |                                                                                                                                                                                                                                                                                                                                                                                                                                                                                                                                                |                                                                                                                                                                                                   |                                    |                                                                              |
|----------------------------|---------------------------------------------------------------------------------------------------------------------------------------------------------------------------------------------------------------------------------------------------------------------------|-----------------------------------------------|------------------------------------------------------------------------------------------------------------------------------------------------------------------------------------------------------------------------------------------------------------------------------------------------------------------------------------------------------------------------------------------------------------------------------------------------------------------------------------------------------------------------------------------------|---------------------------------------------------------------------------------------------------------------------------------------------------------------------------------------------------|------------------------------------|------------------------------------------------------------------------------|
| Shehata et al. 2016 [27]   | Egypt (and Lebanon)                                                                                                                                                                                                                                                       | February 2013–April 2015                      | Surveillance in bats collected from Egypt and Lebanon. Not specified if or how many times repeated sampling at same locations. Caves were in proximity to human-inhabited area but not in proximity to camels.                                                                                                                                                                                                                                                                                                                                 | Oral and rectal swabs as well as blood; lung and liver from select individuals. (not specified)                                                                                                   | Lung, liver, rectal and oral swabs | Combination; 821 sampled with 72 euthanized                                  |
| Leopardi et al. 2016 [28]  | Nigeria                                                                                                                                                                                                                                                                   | 2011 (sampled twice in 2011)                  | Twice-sampled; surveillance for coronaviruses of an urban colony of bats that are regularly consumed as bushmeat.                                                                                                                                                                                                                                                                                                                                                                                                                              | Colony-level fecal (not specified)                                                                                                                                                                | Colony-level fecal                 | Non-destructive                                                              |
| Tao et al. 2017 [19]       | Kenya                                                                                                                                                                                                                                                                     | 2007-2010 (4 years)                           | Sampling of 30 known roosts among the southern regions of Kenya; not specified if or how many times repeated sampling at same locations                                                                                                                                                                                                                                                                                                                                                                                                        | Fecal swabs & oral swabs (suspended in PBS)                                                                                                                                                       | Fecal swabs & oral swabs           | Non-destructive                                                              |
| Waruhiu et al. 2017 [29]   | Kenya                                                                                                                                                                                                                                                                     | 2012-2015 (November to November over 4 years) | Surveillance for bat viruses - survey for various DNA and RNA viruses (astro-, adeno-, calici-, corona-, flavi-, filo-, paramyxo-, polyoma- and rotaviruses); 48 sites mostly southern localities and included diverse roosts all with high level of human interactions (caves, trees, inhabited and abandoned buildings like offices and homes). Not specified if or how many times repeated sampling at same locations.                                                                                                                      | Fecal material (1 fecal pellet per tube in RNAlater Stabilization Reagent, Qiagen). Fecal material collected overnight on sheets.                                                                 | Fecal material                     | Non-destructive                                                              |
| Anthony et al. 2017a [30]  | Central Africa: Cameroon, Gabon, Democratic Republic of Congo, Republic of Congo, Rwanda, Tanzania, Uganda (also in the study Latin America: Peru, Bolivia, Brazil, Mexico, and Asia: Bangladesh, Cambodia, China, Indonesia, Laos, Malaysia, Nepal, Thailand, Viet Nam). | 5 years                                       | Global coronavirus assessment in bat species investigating 20 countries in 3 continents (Latin America, Africa, and Asia) over 5 years. The aim of the study was to identify diversity and factors driving this diversity. Samples were collected at 'high risk' interfaces (deforestation and agricultural expansion, around human dwellings; places of ecotourism, markets, wildlife restaurants and farms, where occupational exposure was likely), where direct or indirect contact with humans might promote zoonotic viral transmission. | Swabs (e.g. oral, urine, rectal), fluids (e.g. saliva), and tissues were collected into either NucliSensVR Lysis Buffer, BioMe'rieux, Inc. or viral transport media (unspecified) with cold-chain | Rectal swabs & oral swabs          | Combination - (predominantly non-destructive with some destructive sampling) |
| Bourgarel et al. 2018 [31] | Zimbabwe                                                                                                                                                                                                                                                                  | June 2016 and February 2017 (10 months)       | Investigation of fecal samples at two cave sites regularly visited by local people to collect bat guano used as fertiliser for viral RNA (coronaviruses and paramyxoviruses). Each site was visited twice during the sampling period.                                                                                                                                                                                                                                                                                                          | Colony-level fecal samples collected on 5 plastic sheets per cave (overnight inside the caves), pooled faeces were mixed with 6 ml of in-house RNA stabilisation solution, Pol Scientific.        | Colony-level fecal                 | Non-destructive                                                              |

|                             |                                                                           |                                                                                                                                                              |                                                                                                                                                                                                                                                                                                                                                                                                                               |                                                                                                                                                                                                                                                                                    |                                         |                                                                                                                                                   |
|-----------------------------|---------------------------------------------------------------------------|--------------------------------------------------------------------------------------------------------------------------------------------------------------|-------------------------------------------------------------------------------------------------------------------------------------------------------------------------------------------------------------------------------------------------------------------------------------------------------------------------------------------------------------------------------------------------------------------------------|------------------------------------------------------------------------------------------------------------------------------------------------------------------------------------------------------------------------------------------------------------------------------------|-----------------------------------------|---------------------------------------------------------------------------------------------------------------------------------------------------|
| Goldenhuis et al. 2018 [32] | South Africa                                                              | 2007-2015 (8 years)                                                                                                                                          | A metagenomic study targeting the gastrointestinal virome of the <i>Neormicia</i> genus in North Eastern and Eastern coastal regions of South Africa; archival samples (n=58) were utilised with a unbiased high-throughput sequencing approach and followed up with PCR analyses of remaining samples (n=42) to determine specific host species identified to harbour specific viruses; repeat sampling at certain locations | Gastrointestinal samples such as fecal pellets and rectal and intestinal specimens (collected dry with cold-chain)                                                                                                                                                                 | fecal material and intestinal specimens | Combination - samples were available and not specifically collected for this surveillance, though bats were entered in museum collections         |
| Ar Gouilh et al., 2018 [33] | Tunisia and Morocco                                                       | 2012                                                                                                                                                         | The study surveyed bats for coronaviruses predominantly in France and Spain (including different regions to include varying climates), with some opportunistic sampling in Morocco and Tunisia. Focus was directed towards regions of large bat diversity including maternity colonies. Not specified if or how many times repeated sampling at same locations.                                                               | Colony-level fecal as well as fecal material from individual bats (viral transport medium with antibiotic supplements or RNA later from Ambion)                                                                                                                                    | Fecal material                          | Non-destructive                                                                                                                                   |
| Yinda et al. 2018 [34]      | Cameroon                                                                  | December 2013 and May 2014                                                                                                                                   | Metagenomics study using samples collected from 3 locations with the South West Region of Cameroon; no repeat sampling                                                                                                                                                                                                                                                                                                        | Fecal material (collected dry with cold-chain)                                                                                                                                                                                                                                     | Fecal material                          | Non-destructive                                                                                                                                   |
| Markotter et al. 2019 [35]  | Rwanda                                                                    | 2008                                                                                                                                                         | Surveillance of Rwandan bat species for the presence of coronaviruses (and paramyxoviruses); not repeated in the study duration                                                                                                                                                                                                                                                                                               | Fecal material, rectal and intestinal samples (suspended in RNAlater Stabilization Reagent, Qiagen)                                                                                                                                                                                | Fecal material                          | Combination; bats that died during processing were taken as vouchers and tissues harvested                                                        |
| Nziza et al. 2019 [36]      | Rwanda                                                                    | 2010-2014                                                                                                                                                    | Surveillance for bat viruses - survey for various RNA viruses (corona-, alpha-, arena-, bunya-, filo-, flavi-, hanta-, influenza-, paramyx-, lenti- and rhabdoviruses.); 25 sites selected and include urban and rural sites characterized by a human-wildlife interface. Frequency of repeat sampling not specified. Part of USAID Emerging Pandemic Threats PREDICT project -reported in Anthony et al. 2017.               | Rectal & oral swabs collected into either BD Universal Viral TransportTM medium and/or NucliSENS Lysis Buffer                                                                                                                                                                      | Rectal swabs & oral swabs               | Non-destructive                                                                                                                                   |
| Joffrin et al. 2020 [38]    | Mozambique, Madagascar, Mauritius, Mayotte, Reunion Island and Seychelles | Mozambique: Feb-May 2015; Mayotte: Nov-Dec 2014; Reunion Island: Feb 2015; Seychelles: Feb-Mar 2014; Mauritius: Nov 2012; Madagascar: Oct-Nov 2014; Jan 2018 | Sampling of the diverse and often isolated species on islands in the Western Indian Ocean. Testing of historical samples combined with more recent sampling events; sampling not necessarily repeated in the study duration.                                                                                                                                                                                                  | Organs (Intestine and lung) collected before 2014 - stored dry. Feces, rectal, and oral swabs after 2014 were collected in 1mL brain heart infusion medium (Conda, Spain) supplemented with antifungals and antibacterial agents. All were stored in liquid nitrogen in the field. | Intestines, feces and rectal swabs      | Combination - some samples were previously collected and included in the surveillance, others include non-destructive fecal collection and swabs. |
| Lacroix et al. 2020 [39]    | Guinea                                                                    | Feb 2016 - Jan 2017                                                                                                                                          | Surveillance of samples previously targeted for ebolavirus and tested for coronaviruses from 7 sites; sampling not repeated in the study duration                                                                                                                                                                                                                                                                             | Rectal and oral swabs an opportunistic fecal (in RNALater, ambient temperature)                                                                                                                                                                                                    | Rectal and oral swabs as well as feces  | Non-destructive                                                                                                                                   |

|                          |       |           |                                                                                                                                                                                     |                                                                   |            |                                                                                                         |
|--------------------------|-------|-----------|-------------------------------------------------------------------------------------------------------------------------------------------------------------------------------------|-------------------------------------------------------------------|------------|---------------------------------------------------------------------------------------------------------|
| Maganga et al. 2020 [40] | Gabon | 2009-2015 | Surveillance of 6 bat caves in Northern Gabon along with non-human primates, rodents and other wildlife (bushmeat) species in the area. Sampling not repeated in the study duration | Intestines (dry) and feces (RNALater) (frozen in liquid nitrogen) | Intestines | Combination - bushmeat, bat and rodent vouchers and collection of fecal samples from bats and wildlife. |
|--------------------------|-------|-----------|-------------------------------------------------------------------------------------------------------------------------------------------------------------------------------------|-------------------------------------------------------------------|------------|---------------------------------------------------------------------------------------------------------|

| Table S2: summaries of study methodologies |                                                                                                               |                                     |                                    |                                                                                                    |                                                                |                                                                                                                     |                     |                            |                                                          |                                                                                                                                                                            |                                                                                                                                                                                                                                                                                                                                                                                                                         |                                                                        |                          |
|--------------------------------------------|---------------------------------------------------------------------------------------------------------------|-------------------------------------|------------------------------------|----------------------------------------------------------------------------------------------------|----------------------------------------------------------------|---------------------------------------------------------------------------------------------------------------------|---------------------|----------------------------|----------------------------------------------------------|----------------------------------------------------------------------------------------------------------------------------------------------------------------------------|-------------------------------------------------------------------------------------------------------------------------------------------------------------------------------------------------------------------------------------------------------------------------------------------------------------------------------------------------------------------------------------------------------------------------|------------------------------------------------------------------------|--------------------------|
| Report                                     | Methods summary                                                                                               | RNA extraction kit                  | Random / specific primers for cDNA | Assay enzyme or kit used                                                                           | Assay primers used/based on                                    | Gene region amplified by surveillance assay (approximate nucleotide position vs. NC_004718.3 SARS coronavirus Tor2) | Surveillance region | Surveillance amplicon size | Sequence accession numbers in manuscript:                | Sequence naming functional                                                                                                                                                 | Performed further characterization (molecular):                                                                                                                                                                                                                                                                                                                                                                         | Specific sample processing describedbefore extraction of nucleic acids | Isolation attempted      |
| Tong et al. 2009 [26]                      | Nested RT-PCR was performed with two sets of coronavirus primers designed in the study. Primers are provided. | QIAMP mini viral spin kit (QIAGEN); | Specific                           | Superscript 3 One-step kit with platinum taq (Invitrogen)                                          | Tong et al. 2009 (developed)                                   | Segment of the RNA-dependent RNA polymerase gene (Nested: 15213-15412 nt)                                           | Universal           | 121                        | Not present; GQ920800-GQ920838                           | <i>Not informative in phylogeny as it does not allow identification of host associated with sequence; eg. BtKY30 (also not listed anywhere in association with a host)</i> | Not in present manuscript; Tao et al. 2012 descseibesadditional characterization.                                                                                                                                                                                                                                                                                                                                       | Not specified                                                          | Not attempted/ described |
| Pfefferle et al. 2009 [37]                 | Nested RT-PCR was performed according to assay and modified primers from a selected reference.                | Viral RNA minikit (QIAGEN);         | Specific                           | Not-specified [One-step RT-PCR kit (Qiagen) with Platinum Taq (Invitrogen) according to reference] | de Souza Luna et al. 2007                                      | Segment of the RNA-dependent RNA polymerase gene (Nested: 15210-15664 nt)                                           | Universal           | 450                        | FJ710043-FJ710056                                        | <i>Yes - e.g. BtCoV/Hip/GhanaBoo/348/2008 allows identification of information such as host, country, year etc. associated with the sequence</i>                           | Specific primers were designed for sequencing longer fragments of the RdRp gene of representative viruses (817 bp of detected alphacoronaviruses and 1,221-bp of betacoronaviruses) as well as nucleoprotien genes. Also performed end-point dilution experiments with the nested pan-CoV RT-PCR (de Souza Luna et al. 2007) to determine viral load. Lastly performed MRCA analyses with available sequence fragments. | Not specified                                                          | Not attempted/ described |
| Quan et al. 2010 [41]                      | Hemi-nested RT-PCR was performed according to primers designed in the study. Primers are provided.            | Not-specified                       | Specific                           | cDNA with SuperScript 3 kit (Invitrogen) and Hot-Star polymerase (Qiagen)                          | Quan et al. 2010                                               | Segment of the RNA-dependent RNA polymerase gene (Nested: 18386-18717 nt)                                           | Non-Universal       | 400                        | HQ166910                                                 | Somewhat; Zaria bat coronavirus is named for the location in Nigeria and denotes the host, but does not associate a specific species to the virus or year                  | Sequenced the complete genome with unbiased high-throughput pyrosequencing                                                                                                                                                                                                                                                                                                                                              | Not specified                                                          | Not attempted/ described |
| Geldenhuys et al. 2013 [42]                | Genus-specific heminested RT-PCR assay designed in this study as performed. Primers available on request.     | TRIzol (Invitrogen);                | Specific                           | Not-specified                                                                                      | Geldenhuys et al. 2013 (based on primers from Woo et al. 2005) | Segment of the RNA-dependent RNA polymerase gene (Nested:15279-15655 nt)                                            | Universal           | Not specified; 360         | Not present; JQ519817-JQ519819                           | <i>Yes - e.g. Mops-BtCoV/1364/SA/11 allows identification of information such as host, country, year etc. associated with the sequence</i>                                 | None                                                                                                                                                                                                                                                                                                                                                                                                                    | Not specified                                                          | Not attempted/ described |
| Ithete et al. 2013 [43]                    | Nested RT-PCR was performed according to assay and modified primers from a selected reference.                | QIAamp Viral RNA Mini Kit (QIAGEN)  | Specific                           | Not-specified                                                                                      | de Souza Luna et al. 2007                                      | Segment of the RNA-dependent RNA polymerase gene (Nested: 15210-15664 nt)                                           | Universal           | 450                        | Not all accessions provided; KC869678, KF843851-KF843862 | <i>Yes - e.g. BtCoV/PML/2011/Neo_zul/RSA/201 allows identification of information such as host, country, year etc. associated with the sequence</i>                        | Extended sequenced regions to 819 bp with RdRp grouping units PCRs designed by Drexler et al. 2010. Corman et al. 2014 described full genome sequencing and characterization of the detected betacoronavirus.                                                                                                                                                                                                           | Not specified                                                          | Not attempted/ described |
| Annan et al. 2013 [44]                     | Nested RT-PCR was performed according to assay and modified primers from a selected reference.                | Viral RNA minikit (QIAGEN);         | Specific                           | Not-specified [One-step RT-PCR kit (Qiagen) with Platinum Taq (Invitrogen) according to reference] | de Souza Luna et al. 2007                                      | Segment of the RNA-dependent RNA polymerase gene (Nested: 15210-15664 nt)                                           | Universal           | 450                        | JX899382–JX899384                                        | <i>Yes - e.g. BtCoV/PKW2E-F82/Nyc_spec/GHA/2011 allows identification of iinformation such as host, country, year etc. associated with the sequence</i>                    | Real-time RT-PCR designed to permit sensitive and quantitative detection of lineage C betacoronaviruses; extended sequenced regions to 819 bp with RdRp grouping units PCRs designed by Drexler et al. 2010                                                                                                                                                                                                             | Not specified                                                          | Not attempted/ described |
| Maganga et al. 2014 [45]                   | Nested RT-PCR was performed according to assay and modified primers from a selected reference.                | Not-specified                       | Not-specified                      | Not-specified                                                                                      | de Souza Luna et al. 2007                                      | Segment of the RNA-dependent RNA polymerase gene (Nested: 15210-15664 nt)                                           | Universal           | Not specified              | JX174638-JX174640; JX174641-JX174642                     | <i>Not informative; no information regarding virus or host species in name, only location, unique identijfier and year eg. CAR/P 31/2009</i>                               | None                                                                                                                                                                                                                                                                                                                                                                                                                    | Not specified                                                          | Not attempted/ described |

|                               |                                                                                                                                                                       |                                          |               |                                                    |                                                      |                                                                                                                                      |                             |               |                                                                              |                                                                                                                                                                                                                                                                                            |                                                                                                                                                                                                                                                                                      |                                                                                                                                                                           |                         |
|-------------------------------|-----------------------------------------------------------------------------------------------------------------------------------------------------------------------|------------------------------------------|---------------|----------------------------------------------------|------------------------------------------------------|--------------------------------------------------------------------------------------------------------------------------------------|-----------------------------|---------------|------------------------------------------------------------------------------|--------------------------------------------------------------------------------------------------------------------------------------------------------------------------------------------------------------------------------------------------------------------------------------------|--------------------------------------------------------------------------------------------------------------------------------------------------------------------------------------------------------------------------------------------------------------------------------------|---------------------------------------------------------------------------------------------------------------------------------------------------------------------------|-------------------------|
| Corman et al. 2015 [46]       | Developed and used a real-time RT-PCR assay for the detection of bat coronaviruses genetically related to HCoV-229E. Primer and probe are provided.                   | MagNA Pure 96 system (Roche)             | Specific      | Superscript 3 RT-PCR kit (Invitrogen)              | Corman et al. 2015                                   | Segment of the RNA-dependent RNA polymerase gene (real time: 13947-14137 nt of NC_002645 HCoV229E)                                   | Non-Universal               | Not specified | KT253259 to KT253323                                                         | Yes - e.g. <i>BtCoV/BUO2E-F160/Hip cf. rub/GHA/2011</i> allows identification of information such as host, country, year etc. associated with the sequence                                                                                                                                 | Obtained extended sequenced regions to 816 bp with RdRp grouping units. PCRs designed by Drexler et al. 2010 and full genomes sequenced for 4 bat 229E-related clades                                                                                                                | Not specified                                                                                                                                                             | Not attempted/described |
| Razanajatovo et al. 2015 [47] | Nested RT-PCR was performed with primers from a reference, an additional hemi-nested step was incorporated with primers designed in this study. Primers are provided. | QIAamp Viral RNA minikit (QIAGEN);       | Random        | cDNA with M-MLV Reverse transcriptase (Invitrogen) | Razanajatovo et al. 2015 (based on Poon et al. 2005) | Segment of the RNA-dependent RNA polymerase gene (Nested: 15216-15656 nt)                                                            | Universal                   | 329           | KF859758-KF859771; KP696741-KP696747                                         | Yes - e.g. <i>BatCoV074F/Pteropus rufus/KP696745/2011</i> allows identification of information such as host, year etc. associated with the sequence (lacks location)                                                                                                                       | Extended sequenced regions of the RdRp gene to 1086 bp with strain-specific primers                                                                                                                                                                                                  | Not specified                                                                                                                                                             | Not attempted/described |
| Shehata et al. 2016 [27]      | Nested RT-PCR was performed according to assay and primers described in this study. Primers are provided in technical appendix.                                       | QIAamp viral RNA minikit (QIAGEN)        | Specific      | One-step RT-PCR kit (Qiagen)                       | Shehata et al. 2016                                  | Segment of the RNA-dependent RNA polymerase gene (Nested: 15266-15655 nt)                                                            | Universal                   | 440           | Not all accessions provided; KT346237-KT346243, KT581595, KT581600, KT581602 | Yes - e.g. <i>Rousettus/Egypt/NRC-HKU-B81</i> allows identification of information such as host and country etc. associated with the sequence                                                                                                                                              | MERS-specific envelope-gene quantitative RT-PCR was performed as well as serological testing of 370 serum samples. All negative. PCR designed specifically for this study was used for amplifying N gene sequences of HKU9-related viruses (primers provided in technical appendix). | Not specified                                                                                                                                                             | Not attempted/described |
| Leopardi et al. 2016 [28]     | Nested RT-PCR was performed according to assay and modified primers from a selected reference (modifications not provided)                                            | Nucleospin RNA II kit (Macherey - Nagel) | Specific      | Superscript 3 One-step RT-PCR kit (Invitrogen)     | de Souza Luna et al. 2007                            | Segment of the RNA-dependent RNA polymerase gene (Nested: 15210-15664 nt)                                                            | Universal                   | 398           | KU131210 to KU131215                                                         | Yes - e.g. <i>BtCoV/KU131213/59/Eidolon_helvum/Nigeria/2011</i> allows identification of information such as host, country, year etc. associated with the sequence                                                                                                                         | Continued with sequenced region extension using targeted pathogen genome amplification with Sanger and next generation sequencing (MiSeq-Illumina) approaches (approximatley 800 and 2000 bp)                                                                                        | Not specified                                                                                                                                                             | Not attempted/described |
| Tao et al. 2017 [19]          | Nested RT-PCR was performed with Pan bat CoV RT-PCR primers from a given reference (with no modifications given)                                                      | QIAMP mini viral spin kit (QIAGEN)       | Specific      | Superscript 3 One-step RT-PCR kit (Invitrogen)     | Tong et al. 2009                                     | Segment of the RNA-dependent RNA polymerase gene (Nested: 15213-15412 nt)                                                            | Universal                   | 400           | Not all sequences are submitted to Genbank; KY073744 to KY073748             | Yes - e.g. <i>BtKYNL63-9b Triaenops afer</i> or <i>BtKY237 Rhinolophus hilderbrandtii</i> allows identification of a unique identifier, country and host associated with the sequence                                                                                                      | Obtained complete genomes of selected lineages with detailed characterization                                                                                                                                                                                                        | Not specified                                                                                                                                                             | Not attempted/described |
| Waruhiu et al. 2017 [29]      | Nested RT-PCR was performed with modified primers from a given reference. Primers are provided in technical appendix.                                                 | Pure viral RNA kit (Roche)               | Specific      | Superscript 3 One-step RT-PCR kit (Invitrogen)     | Waruhiu et al. 2017 (based on Watanabe et al. 2010)  | Segment of the RNA-dependent RNA polymerase gene (Nested: 15216-15655 nt)                                                            | Universal                   | 434           | Not present; MH170074-MH170150                                               | Yes - e.g. <i>BatCoV/BAT2363/Hipposideros caffer/KEN/Meru/2015</i> , allows identification of information such as host, location, year etc. associated with the sequence                                                                                                                   | None                                                                                                                                                                                                                                                                                 | Collected fecal was vortexed and underwent clearing centrifugation of which 200µL was used for viral nucleic acid extraction.                                             | Not attempted/described |
| Anthony et al. 2017a [30]     | Two separate assays for coronavirus detection used prepared cDNA to amplify non-overlapping segments of the target ORF - primers from given references.               | Not specified                            | Not-specified | cDNA with Superscript 3 (Invitrogen)               | Quan et al. 2010 and Watanabe et al. 2010            | Two different segments of the RNA-dependent RNA polymerase gene (Quan et al. Nested: 18386-18717 nt; Watanabe et al. 15216-15654 nt) | Universal and non-universal | 332 and 434   | Not present; KX284927-KX286327                                               | Not informative regarding source of reported sequence (host/location etc) if sequences are named after most similar previously described relative. E.g. sequence named "Kenya bat coronavirus/BtKY56/BtKY55 PREDICT-GVF-CM-ECO06409" refers to a <i>Epomops coronavirus</i> from Cameroon. | None                                                                                                                                                                                                                                                                                 | Not specified                                                                                                                                                             | Not attempted/described |
| Bourgarel et al. 2018 [31]    | A total of 123 pools were analysed with primers from a given reference.                                                                                               | NucleoSpin® RNA Kit (Macherey-Nagel)     | Random        | Not described                                      | Chu et al. 2011                                      | Segment of the RNA-dependent RNA polymerase gene (Nested: 15216-15656 nt)                                                            | Universal                   | 415           | MG000865-MG000872                                                            | Yes - e.g. <i>BtCoV/CR001Mab_Hip.spp_ZIM</i> allows identification of information such as host, country etc. associated with the sequence (lacks year)                                                                                                                                     | None                                                                                                                                                                                                                                                                                 | Fecal matter (+/-6g) was pooled and underwent twice clearing centrifugation and filtration prior to pelleting with ultracentrifugation (250,000 g for 2.5 hours at 4 °C). | Not attempted/described |

|                             |                                                                                                                                                                                  |                                                          |               |                                                                                                                                              |                                                                          |                                                                                                                                                   |                             |                                         |                                                                                                    |                                                                                                                                                                                                                                                                                     |                                                                                                                                                                                                                                                                       |                                                                                                                                                                                                                                                                     |                          |
|-----------------------------|----------------------------------------------------------------------------------------------------------------------------------------------------------------------------------|----------------------------------------------------------|---------------|----------------------------------------------------------------------------------------------------------------------------------------------|--------------------------------------------------------------------------|---------------------------------------------------------------------------------------------------------------------------------------------------|-----------------------------|-----------------------------------------|----------------------------------------------------------------------------------------------------|-------------------------------------------------------------------------------------------------------------------------------------------------------------------------------------------------------------------------------------------------------------------------------------|-----------------------------------------------------------------------------------------------------------------------------------------------------------------------------------------------------------------------------------------------------------------------|---------------------------------------------------------------------------------------------------------------------------------------------------------------------------------------------------------------------------------------------------------------------|--------------------------|
| Goldenhuis et al. 2018 [32] | Viral metagenomics was followed up with consensus PCR confirmation using a developed multiplexed genus-specific nested RT-PCR assay. Primers are provided in technical appendix. | Duet RNA/ DNA miniprep plus kit (ZymoResearch)           | Random        | cDNA with Superscript 3 (Invitrogen)                                                                                                         | Metagenomics; Goldenhuys et al. 2018 (based on Goldenhuys et al. 2013)   | Segment of the RNA-dependent RNA polymerase gene (Nested: 15388-15655 nt)                                                                         | Universal                   | 268                                     | MF593268 and MF593271 (coronaviruses)                                                              | Yes - e.g. BatCoV/Neo5038/KZN/RSA/2015 allows identification of information such as host, country, year etc. associated with the sequence                                                                                                                                           | Extended the alphacoronavirus sequenced region to 600 bp as well as full genome characterization of the betacoronavirus                                                                                                                                               | Not specified                                                                                                                                                                                                                                                       | Not attempted/ described |
| Ar Gouilh et al., 2018 [33] | Nested RT-PCR was performed with primers from a given reference.                                                                                                                 | Not specified                                            | Random        | cDNA with Superscript 3 (Invitrogen)                                                                                                         | Gouilh et al., 2011                                                      | Segment of the RNA-dependent RNA polymerase gene (Nested: 15438-15655 nt)                                                                         | Universal                   | 220                                     | KY423445, KY423485- KY423487                                                                       | Yes - e.g. AlphacoV_EP19SPA/TUN_Myomy o/Myopun_2011/2012 allows identification of information such as host, country, year etc. associated with the sequence                                                                                                                         | None                                                                                                                                                                                                                                                                  |                                                                                                                                                                                                                                                                     | Not attempted/ described |
| Yinda et al. 2018 [34]      | Enriched for viral particles using the NetoVIR protocol (Conceicao-Neto et al. 2015) and sequenced on the Illumina HiSeq 2500 platform for 300 cycles.                           | QIAamp Viral RNA Mini Kit (Qiagen, Hilden, Germany)      | -             | Whole Transcriptome Amplification Kit, Sigma-Aldrich.                                                                                        | Metagenomics                                                             | Complete genomes obtained                                                                                                                         | Not applicable              | metagenomics                            | MG693168- MG693172                                                                                 | Yes - e.g. Bat-CoV/900/Eidolon helvum/2014/CMR allows identification of information such as host, country, year etc. associated with the sequence                                                                                                                                   | Obtained partial/complete genomes with highthroughput sequencing                                                                                                                                                                                                      | Prepared 25 pools (1-5 samples per pool) that were homogenized and underwent filtration through a series of membrane filters. The filtrate was then treated with an enzyme cocktail of to digest free-floating nucleic acids.                                       | Not attempted/ described |
| Markotter et al. 2019 [35]  | Nested RT-PCR was performed with primers from a given reference.                                                                                                                 | Duet RNA/ DNA miniprep plus kit (ZymoResearch)           | Random        | cDNA with Superscript 3 (Invitrogen)                                                                                                         | Goldenhuis et al. 2018                                                   | Segment of the RNA-dependent RNA polymerase gene (Nested: 15388-15655 nt)                                                                         | Universal                   | 268                                     | JQ649535- JQ649536                                                                                 | Yes - e.g. Rh-BtCoV/441/Rwanda/08 and Rh-BtCoV/445/Rwanda/08 allows identification of information such as host, country, year etc. associated with the sequence                                                                                                                     | Extended sequenced regions to 820 bp with RdRp grouping units PCRs designed by Drexler et al. 2010                                                                                                                                                                    | Not specified                                                                                                                                                                                                                                                       | Not attempted/ described |
| Nziza et al. 2019 [36]      | Two separate assays for coronavirus detection used prepared cDNA to amplify non-overlapping segments of the target ORF - primers from given references.                          | QIAamp Viral RNA Mini Kit (QIAGEN)                       | Not-specified | cDNA with Superscript 3 (Invitrogen)                                                                                                         | Quan et al. 2010 and Watanabe et al. 2010                                | Two different segments of the RNA-dependent RNA polymerase gene (Quan et al. Nested: 18386-18717 nt; Watanabe et al. 15216-15654 nt)              | Universal and non-universal | 332 and 434                             | KX286324- KX285828, KX285830, KX285106- KX285108, KX286259, KX285819, KX285821, KX285822, KX285111 | Not informative regarding source of reported sequence (host/location etc) if sequences are named after most similar previously described relative. E.g. sequence named "Kenya bat coronavirus/BtKY56/BtKY55 PREDICT-GVF-CM-ECO06409" refers to a Epomops coronavirus from Cameroon. | None                                                                                                                                                                                                                                                                  | Not specified                                                                                                                                                                                                                                                       | Not attempted/ described |
| Joffrin et al. 2020 [38]    | Real time assays in combination with conventional assays for phylogeny.                                                                                                          | QIAamp Viral RNA mini kit (QIAGEN)                       | Random        | ProtoScript II Reverse Transcriptase and Random Primer 6 (New England Biolabs); ABsolute Blue QPCR Mix low ROX 1X (Thermo Fisher Scientific) | Muradrasoli, et al. 2009 (real time); Poon et al.2005 (conventional PCR) | Segment of the RNA-dependent RNA polymerase gene (Real time corresponding to 15647-15825 nt; conventional assay corresponding to: 15216-15655 nt) | Universal and non-universal | Real time: 179; Conventional assay: 440 | MN183146- MN183273                                                                                 | Yes - e.g. Bat_CoV_FMNH_229303_Mozambique_Mo.condylurus _2015_MN183182 allows identification of unique identifiers, location and host.                                                                                                                                              | No, real-time followed by conventional PCR assay based on the assay from Poon et al 2005.                                                                                                                                                                             | Not specified                                                                                                                                                                                                                                                       | Not attempted/ described |
| Lacroix et al. 2020 [39]    | Nested RT-PCR was performed with modified primers from a given reference. Primers are not provided.                                                                              | NuclISENS EasyMAG platform (BioMérieux, Marcy-l'Etoile). | Random        | Reverse Transcription System kit with random primers (Promega); GoTaq Hot Start Master Mix PCR kit (Promega)                                 | Chu et al. 2011; (modified protocol)                                     | Segment of the RNA-dependent RNA polymerase gene (Nested: 15216-15656 nt)                                                                         | Universal                   | 440                                     | MT586830- MT586867                                                                                 | Yes - e.g. CCGU33_Ep_gambianus_GN though missing some data, it does allow identification of the host and country                                                                                                                                                                    | None                                                                                                                                                                                                                                                                  | Not specified                                                                                                                                                                                                                                                       | Not attempted/ described |
| Maganga et al. 2020 [40]    | Nested RT-PCR surveillance of samples performed according to a published assay, with high throughput sequencing on selected positives                                            | EZ1 RNA tissue mini kit (Qiagen)                         | Specific      | Qiagen One-step RT PCR kit (Qiagen), and Platinum Taq DNA polymerase kit (Life Technologies).                                                | de Souza Luna et al. 2007                                                | Segment of the RNA-dependent RNA polymerase gene (Nested: 15210-15664 nt)                                                                         | Universal                   | 494                                     | MG963186- MG963189 and MG963191- MG963201                                                          | Yes - e.g . MG963196_09GB0376 Hipposideroscfruber_2009 allows identification of host and year of detected sequence                                                                                                                                                                  | Attempted high throughput MiSeq sequencing of three positive samples. The cDNAs were prepared with SuperScript III (Thermo Fisher Scientific). Size selection was performed followed by library preparation with the NEBNext Ultra RNA Library Prep kit for Illumina. | Nearly 100 mg intestines were pooled according to species and homogenized in PBS using a ball-mill tissue grinder (Geno/Grinder 2000, Spex Centriprep). RNALater was removed from feces preserved therein, suspended in PBS, and centrifuged at 1500 rpm for 5 min. | Not attempted/ described |

| Table S3: summaries of species tested and positive percentages obtained per studies |                                                  |                                                                                             |                                                                 |                                                                        |                                                |                                                                                                                              |
|-------------------------------------------------------------------------------------|--------------------------------------------------|---------------------------------------------------------------------------------------------|-----------------------------------------------------------------|------------------------------------------------------------------------|------------------------------------------------|------------------------------------------------------------------------------------------------------------------------------|
| Report                                                                              | Number of bat species (genera) tested in total:  | Average number of individuals per species (range of number of individuals):                 | Number of species below 10 individuals (% of species in study): | Number of species found to harbour coronaviruses (% species positive): | Overall positivity:                            | Host species identification methods:                                                                                         |
| Tong et al. 2009 [26]                                                               | 21 species (14 genera)                           | 10.5 (1-39)                                                                                 | 12 (57.1%)                                                      | 11 species (52.4%)                                                     | 18.6% (41/221)                                 | Not described                                                                                                                |
| Pfefferle et al. 2009 [37]                                                          | 10 species (7 genera)                            | 13.7 (1-59)                                                                                 | 6 (60%)                                                         | 1 species (10%)                                                        | 3.6 % (12/335)                                 | Morphological identification confirmed with mitochondrial cytochrome b gene sequencing                                       |
| Quan et al. 2010 [41]                                                               | 6 species (5 genera)                             | Cannot be determined; totals per species tested are not specified (total of 33 bats tested) | -                                                               | 1 species (16.7%)                                                      | 3.0% (1/33)                                    | Not described                                                                                                                |
| Geldenhuys et al. 2013 [42]                                                         | 29 species (14 genera)                           | 3.8 (1-14)                                                                                  | 27 (93.1%)                                                      | 3 species (10.3%)                                                      | 2.7% (3/113)                                   | Not described                                                                                                                |
| Ithete et al. 2013 [43]                                                             | 12 species (10 genera)                           | 5.5 (1-13)                                                                                  | 9 (75%)                                                         | 1 species (8.3%)                                                       | 8% (5/62)                                      | Experienced chiroptologist used morphological systematics                                                                    |
| Annan et al. 2013 [44]                                                              | 10 species (5 genera)                            | 475.8 (1-3763)                                                                              | 2 (20%)                                                         | 1 species (10%)                                                        | 0.97% (46/4758)                                | Not described                                                                                                                |
| Maganga et al. 2014 [45]                                                            | Overall: 15 species (14 genera)                  | 101.6                                                                                       | 7 (46.67%)                                                      | 2 species (13.3%)                                                      | 0.13% (5/3874)                                 | Field identification by trained field biologist and confirmed with sequencing the mitochondrial cytochrome b gene sequences. |
|                                                                                     | Gabon: 12 species (11 genera)                    | 162.75 (15-492)                                                                             | 0 species                                                       | 1 species                                                              | 0.2% (3/1953)                                  |                                                                                                                              |
|                                                                                     | Republic of Congo: 6 species (6 genera)          | 125 (2-286)                                                                                 | 3 (50%)                                                         | 0 species                                                              | 0%                                             |                                                                                                                              |
|                                                                                     | Senegal: 2 species (2 genera)                    | 16.5 (15-18)                                                                                | 0 species                                                       | 0 species                                                              | 0%                                             |                                                                                                                              |
|                                                                                     | Central African Republic: 11 species (11 genera) | 103 (1-533)                                                                                 | 4 species (36.4%)                                               | 1 species                                                              | 0.2% (2/1138)                                  |                                                                                                                              |
| Corman et al. 2015 [46]                                                             | 11 species (7 genera)                            | 189.73 (4-1611)                                                                             | 4 (36.4%)                                                       | 2 species (18.2%)                                                      | 3.9% (81/2087)                                 | Morphologically identified in the field                                                                                      |
| Razanajatovo et al. 2015 [47]                                                       | 3 species (3 genera)                             | 104.3* (76-141)                                                                             | 0 species                                                       | 2 species (66.7%)                                                      | 4.5% (14/313*)                                 | Identified using morphological features by field trained team (ecologist and veterinarian)                                   |
| Shehata et al. 2016 [27]                                                            | 3 species (3 genera)                             | 123.3 (31-257)                                                                              | 0 species                                                       | 2 species (66.7%)                                                      | 5.1% (19/370)                                  | Not described                                                                                                                |
| Leopardi et al. 2016 [28]                                                           | 1 species (1 genus)                              | Cannot be determined as colony-level fecal samples were collected                           | -                                                               | 1 species (100%)                                                       | 7.6 % (6/79) within the sampled fecal material | Not described                                                                                                                |
| Tao et al. 2017 [19]                                                                | 27 species (17 genera)                           | 76.3 (2-397)                                                                                | 5 (18.5%)                                                       | 18 species (66.7%)                                                     | 11.7% (240/2050)                               | Trained field biologist and confirmed with Cytochrome B sequencing                                                           |



|                             |                                                                                                   |                                                                                                                                                                                                                                                                                                                                 |            |                     |                   |                                                                                                                                             |
|-----------------------------|---------------------------------------------------------------------------------------------------|---------------------------------------------------------------------------------------------------------------------------------------------------------------------------------------------------------------------------------------------------------------------------------------------------------------------------------|------------|---------------------|-------------------|---------------------------------------------------------------------------------------------------------------------------------------------|
| Waruhiu et al. 2017 [29]    | 22 species (16 genera)                                                                            | Cannot determine average number of individuals sampled or ranges of most to least sampled; Total fecal collected: 3334, and only 2014 tested for coronaviruses. No totals of bat individuals/species tested are not specified; totals are given tested per site (all species), with positive species and individuals indicated. | -          | 9 species (40.9.7%) | 4% (80/2014)      | Experienced chiroptologist and confirmed with Cytochrome B sequencing                                                                       |
| Anthony et al. 2017a [30]   | Totals positive and numbers per species are not indicated in Anthony et al. 2017a; sample numbers |                                                                                                                                                                                                                                                                                                                                 |            | 34 species          | 9.4% (1097/11704) | Lowest taxonomic order identified (genus and species) and assigned to an age class (adult, subadult, neonate) by the field teams            |
|                             | Cameroon                                                                                          | 31 (1-674)                                                                                                                                                                                                                                                                                                                      | 31 (58.5%) | 20 species (37.7%)  | 7.8% (210/2679)   |                                                                                                                                             |
|                             | DRC                                                                                               | 46 (1-520)                                                                                                                                                                                                                                                                                                                      | 16 (49%)   | 10 species (30%)    | 5.5% (84/1520)    |                                                                                                                                             |
|                             | Gabon                                                                                             | 217 (2-859)                                                                                                                                                                                                                                                                                                                     | 4 (36%)    | 1 species (9%)      | 0.1% (3/2389)     |                                                                                                                                             |
|                             | COG                                                                                               | 19 (1-148)                                                                                                                                                                                                                                                                                                                      | 26 (70%)   | 13 species (35%)    | 8.9% (66/734)     |                                                                                                                                             |
|                             | Rwanda                                                                                            | 41 (1-286)                                                                                                                                                                                                                                                                                                                      | 12 (50%)   | 11 species (46%)    | 7.1% (70/990)     |                                                                                                                                             |
|                             | Tanzania                                                                                          | 168 (1-1432)                                                                                                                                                                                                                                                                                                                    | 6 (40%)    | 7 species (47%)     | 25.7% (647/2517)  |                                                                                                                                             |
|                             | Uganda                                                                                            | 49 (1-270)                                                                                                                                                                                                                                                                                                                      | 13 (72%)   | 5 species (28%)     | 1.9% (17/875)     |                                                                                                                                             |
| Bourgarel et al. 2018 [31]  | 1 species (1 genus)                                                                               | Cannot be determined as colony-level fecal samples were collected                                                                                                                                                                                                                                                               | -          | 1 species (100%)    | 6.5% (8/123)      | Cytochrome B sequencing                                                                                                                     |
| Geldenhuys et al. 2018 [32] | 4 species (1 genus)                                                                               | 10.5 (3-24)                                                                                                                                                                                                                                                                                                                     | 3 (75%)    | 1 species (25%)     | 4.8% (2/42)       | Experienced taxonomist in collaboration with a museum and confirmed with mitochondrial cytochrome c oxidase subunit I (COI) gene sequencing |
| Ar Gouilh et al., 2018 [33] | 5 species (4 genera)                                                                              | 4.4 (2-8)                                                                                                                                                                                                                                                                                                                       | 5 (100%)   | 2 species (40%)     | 16% (4/25)        | Morphological identification, acoustic data and confirmed with cytochrome B gene sequencing                                                 |
| Yinda et al. 2018 [34]      | 2 species (2 genera)                                                                              | 43.5 (1-85)                                                                                                                                                                                                                                                                                                                     | 1 (50%)    | 1 species (50%)     | 52% of 25 pools   | Not described                                                                                                                               |
| Markotter et al. 2019 [35]  | 5 species (5 genera)                                                                              | 20.2 (2-72)                                                                                                                                                                                                                                                                                                                     | 3 (40%)    | 1 species (20%)     | 2% (2/101)        | Morphological identification and confirmed with cytochrome B or cytochrome oxidase one gene sequencing                                      |
| Nziza et al. 2019 [36]      | 16 species (14 genera)                                                                            | 31 (1-130)                                                                                                                                                                                                                                                                                                                      | 8 (50%)    | 8 species (50%)     | 5.4% (27/503)     | Morphological and confirmed with cytochrome b (cyt b) or cytochrome oxidase one (COI) gene                                                  |
| Joffrin et al. 2020 [38]    | 36 species (18 genera)                                                                            | 26.7 (2-94)                                                                                                                                                                                                                                                                                                                     | 12 (33.4%) | 13 species (36.1%)  | 8.7% (88/1013)    | Not described - mitochondrial cytochrome b gene sequencing                                                                                  |

|                                       |                        |               |           |                 |                 |                                                                               |
|---------------------------------------|------------------------|---------------|-----------|-----------------|-----------------|-------------------------------------------------------------------------------|
| Lacroix et al. 2020 [39]              | 14 species (14 genera) | 22.8 (1-120)  | 9 (64.3%) | 8 species (57%) | 11% (35/319)    | Morphological measurements and molecular barcode (cytochrome b) confirmation. |
| Maganga et al. 2020 [40]              | 5 species (4 genera)   | 213 (112-287) | 0 species | 2 species (40%) | 1.41% (15/1066) | Bat and rodent species were identified by trained field biologists.           |
| * specifically refers to rectal swabs |                        |               |           |                 |                 |                                                                               |

Table S4: Coronaviruses detected per species

| Taxonomic rank and extinct taxa (extinct taxa are indicated in grey text) | Species                                | Coronavirus detected in species (yes/no) | Number of individuals tested (counting totals of individuals provided in studies and positive individuals in reports where totals are not provided) | Types of coronavirus detected; similar to specified clades (refer to "like" as their grouping within subgenera are not certain) | Countries (all locations tested)                                                                                                                                     | References                                                                                                                                                                                                 | Reported as Bushmeat (Reviewed in Mildenstein et al 2016) |
|---------------------------------------------------------------------------|----------------------------------------|------------------------------------------|-----------------------------------------------------------------------------------------------------------------------------------------------------|---------------------------------------------------------------------------------------------------------------------------------|----------------------------------------------------------------------------------------------------------------------------------------------------------------------|------------------------------------------------------------------------------------------------------------------------------------------------------------------------------------------------------------|-----------------------------------------------------------|
| <b>FAMILY Pteropodidae</b>                                                |                                        | 14/44 (22 tested; 22 not tested)         | 10851                                                                                                                                               |                                                                                                                                 |                                                                                                                                                                      |                                                                                                                                                                                                            |                                                           |
| <b>Genus Eidolon</b>                                                      |                                        | <b>2/2</b>                               | <b>3096</b>                                                                                                                                         |                                                                                                                                 |                                                                                                                                                                      |                                                                                                                                                                                                            |                                                           |
|                                                                           | <i>Eidolon dupreanum</i>               | Yes                                      | 96                                                                                                                                                  | BetaCoV (Nobecovirus)                                                                                                           | Madagascar                                                                                                                                                           | Razanajatovo et al. 2015                                                                                                                                                                                   | Yes                                                       |
|                                                                           | <i>Eidolon helvum</i>                  | Yes                                      | 3000                                                                                                                                                | AlphaCoV (Novel); BetaCoV (Nobecovirus)                                                                                         | Cameroon, Kenya, Nigeria, Ghana, Gabon, Senegal, Central African Republic, Tanzania, Rwanda, Republic of the Congo, Democratic Republic of the Congo, Uganda, Guinea | Pfefferle et al., 2009; Maganga et al. 2014; Anthony et al. 2017a, Tong et al. 2009, Waruhiu et al. 2017, Tao et al. 2017, Leopardi et al. 2016, Yinda et al. 2018, Nziza et al. 2019; Lacroix et al. 2020 | Yes                                                       |
| <b>Genus Pteropus</b>                                                     |                                        | <b>1/8</b>                               | <b>196</b>                                                                                                                                          |                                                                                                                                 |                                                                                                                                                                      |                                                                                                                                                                                                            |                                                           |
|                                                                           | <i>Pteropus aldabrensis</i>            | -                                        | -                                                                                                                                                   |                                                                                                                                 |                                                                                                                                                                      |                                                                                                                                                                                                            |                                                           |
|                                                                           | <i>Pteropus livingstonii</i>           | -                                        | -                                                                                                                                                   |                                                                                                                                 |                                                                                                                                                                      |                                                                                                                                                                                                            | Yes                                                       |
|                                                                           | <i>Pteropus niger</i>                  | No                                       | 48                                                                                                                                                  | -                                                                                                                               | Mauritius                                                                                                                                                            | Joffrin et al. 2020                                                                                                                                                                                        | Yes                                                       |
|                                                                           | <i>Pteropus rodricensis</i>            | -                                        | -                                                                                                                                                   |                                                                                                                                 |                                                                                                                                                                      |                                                                                                                                                                                                            | Yes                                                       |
|                                                                           | <i>Pteropus rufus</i>                  | Yes                                      | 76                                                                                                                                                  | BetaCoV (Nobecovirus)                                                                                                           | Madagascar                                                                                                                                                           | Razanajatovo et al. 2015                                                                                                                                                                                   | Yes                                                       |
|                                                                           | <i>Pteropus seychellensis</i>          | No                                       | 72                                                                                                                                                  | -                                                                                                                               | Mayotte, Seychelles                                                                                                                                                  | Joffrin et al. 2020                                                                                                                                                                                        | Yes                                                       |
|                                                                           | <i>Pteropus subniger</i>               | -                                        | -                                                                                                                                                   |                                                                                                                                 |                                                                                                                                                                      |                                                                                                                                                                                                            |                                                           |
|                                                                           | <i>Pteropus voeltzkowi</i>             | -                                        | -                                                                                                                                                   |                                                                                                                                 |                                                                                                                                                                      |                                                                                                                                                                                                            | Yes                                                       |
| <b>Genus Casinycteris</b>                                                 |                                        | <b>0/3</b>                               | <b>7</b>                                                                                                                                            |                                                                                                                                 |                                                                                                                                                                      |                                                                                                                                                                                                            |                                                           |
|                                                                           | <i>Casinycteris argynnis</i>           | No                                       | 7                                                                                                                                                   | -                                                                                                                               | Cameroon, Republic of Congo                                                                                                                                          | Anthony et al. 2017a                                                                                                                                                                                       |                                                           |
|                                                                           | <i>Casinycteris campomaanensis</i>     | -                                        | -                                                                                                                                                   |                                                                                                                                 |                                                                                                                                                                      |                                                                                                                                                                                                            |                                                           |
|                                                                           | <i>Casinycteris ophiodon</i>           | -                                        | -                                                                                                                                                   |                                                                                                                                 |                                                                                                                                                                      |                                                                                                                                                                                                            |                                                           |
| <b>Genus Epomophorus</b>                                                  |                                        | <b>3/10</b>                              | <b>468</b>                                                                                                                                          |                                                                                                                                 |                                                                                                                                                                      |                                                                                                                                                                                                            |                                                           |
|                                                                           | <i>Epomophorus angolensis</i>          | -                                        | -                                                                                                                                                   |                                                                                                                                 |                                                                                                                                                                      |                                                                                                                                                                                                            |                                                           |
|                                                                           | <i>Epomophorus anelli</i>              | -                                        | -                                                                                                                                                   |                                                                                                                                 |                                                                                                                                                                      |                                                                                                                                                                                                            |                                                           |
|                                                                           | <i>Epomophorus crypturus</i>           | -                                        | -                                                                                                                                                   |                                                                                                                                 |                                                                                                                                                                      |                                                                                                                                                                                                            |                                                           |
|                                                                           | <i>Epomophorus dobsonii</i>            | -                                        | -                                                                                                                                                   |                                                                                                                                 |                                                                                                                                                                      |                                                                                                                                                                                                            |                                                           |
|                                                                           | <i>Epomophorus gambianus</i>           | Yes                                      | 158                                                                                                                                                 | AlphaCoV (Novel); BetaCoV (Novel); Nobecovirus)                                                                                 | Cameroon, Democratic Republic of the Congo, South Africa, Central African Republic, Senegal, Guinea                                                                  | Anthony et al. 2017a, Geldenhuys et al. 2013, Maganga et al. 2014, Yinda et al. 2018, Lacroix et al. 2020                                                                                                  | Yes                                                       |
|                                                                           | <i>Epomophorus grandis</i>             | -                                        | -                                                                                                                                                   |                                                                                                                                 |                                                                                                                                                                      |                                                                                                                                                                                                            |                                                           |
|                                                                           | <i>Epomophorus labiatus</i>            | Yes                                      | 167                                                                                                                                                 | AlphaCoV (Novel); BetaCoV (Novel)                                                                                               | Rwanda, Kenya, Senegal, South Africa, Central African Republic, Cameroon                                                                                             | Tao et al. 2017; Nziza et al. 2019; Anthony et al. 2017a, Maganga et al. 2014, Geldenhuys et al. 2013                                                                                                      | Yes                                                       |
|                                                                           | <i>Epomophorus minimus</i>             | -                                        | -                                                                                                                                                   |                                                                                                                                 |                                                                                                                                                                      |                                                                                                                                                                                                            |                                                           |
|                                                                           | <i>Epomophorus minor</i>               | -                                        | -                                                                                                                                                   |                                                                                                                                 |                                                                                                                                                                      |                                                                                                                                                                                                            |                                                           |
|                                                                           | <i>Epomophorus wahlbergi</i>           | Yes                                      | 80                                                                                                                                                  | BetaCoV (Nobecovirus)                                                                                                           | Kenya, South Africa, Tanzania                                                                                                                                        | Geldenhuys et al. 2013, Tong et al., 2009; Tao et al. 2017                                                                                                                                                 |                                                           |
|                                                                           | not determined to species level (spp.) | No                                       | 63                                                                                                                                                  | -                                                                                                                               | Rwanda, Republic of Congo, Tanzania                                                                                                                                  | Markotter et al. 2019, Anthony et al. 2017a                                                                                                                                                                |                                                           |
| <b>Genus Epomops</b>                                                      |                                        | <b>1/2</b>                               | <b>1272</b>                                                                                                                                         |                                                                                                                                 |                                                                                                                                                                      |                                                                                                                                                                                                            |                                                           |
|                                                                           | <i>Epomops buettikoferi</i>            | No                                       | 3                                                                                                                                                   | -                                                                                                                               | Guinea                                                                                                                                                               | Lacroix et al. 2020                                                                                                                                                                                        |                                                           |
|                                                                           | <i>Epomops franqueti</i>               | Yes                                      | 1257                                                                                                                                                | BetaCoV (Nobecovirus)                                                                                                           | Cameroon, Democratic Republic of the Congo, Republic of the Congo, Gabon                                                                                             | Anthony et al. 2017a, Maganga et al. 2014                                                                                                                                                                  | Yes                                                       |

|                              |                                        |                                 |             |                                         |                                                                                                                                                                         |                                                                                                                                                                                                               |     |
|------------------------------|----------------------------------------|---------------------------------|-------------|-----------------------------------------|-------------------------------------------------------------------------------------------------------------------------------------------------------------------------|---------------------------------------------------------------------------------------------------------------------------------------------------------------------------------------------------------------|-----|
|                              | not determined to species level (spp.) | No                              | 12          | -                                       | Democratic Republic of the Congo, Republic of Congo                                                                                                                     | Anthony et al. 2017a                                                                                                                                                                                          |     |
| <b>Genus Hypsignathus</b>    |                                        | <b>0/1</b>                      | <b>279</b>  |                                         |                                                                                                                                                                         |                                                                                                                                                                                                               |     |
|                              | Hypsignathus monstrosus                | No                              | 279         | -                                       | Democratic Republic of the Congo, Republic of the Congo, Gabon, Cameroon, Guinea                                                                                        | Maganga et al. 2014, Anthony et al. 2017a, Lacroix et al. 2020                                                                                                                                                | Yes |
| <b>Genus Megaloglossus</b>   |                                        | <b>1/2</b>                      | <b>456</b>  |                                         |                                                                                                                                                                         |                                                                                                                                                                                                               |     |
|                              | Megaloglossus azagnyi                  | -                               | -           |                                         |                                                                                                                                                                         |                                                                                                                                                                                                               |     |
|                              | Megaloglossus woermanni                | Yes                             | 395         | AlphaCoV (Novel), BetaCoV (Novel)       | Republic of the Congo, Central African Republic, Gabon, Democratic Republic of the Congo, Cameroon                                                                      | Anthony et al. 2017a, Maganga et al. 2014                                                                                                                                                                     |     |
|                              | not determined to species level (spp.) | No                              | 61          | -                                       | Democratic Republic of the Congo                                                                                                                                        | Anthony et al. 2017a                                                                                                                                                                                          |     |
| <b>Genus Micropteropus</b>   |                                        | <b>1/2</b>                      | <b>892</b>  |                                         |                                                                                                                                                                         |                                                                                                                                                                                                               |     |
|                              | Micropteropus intermedius              | -                               | -           |                                         |                                                                                                                                                                         |                                                                                                                                                                                                               |     |
|                              | Micropteropus pusillus                 | Yes                             | 892         | AlphaCoV (Novel), BetaCoV (Novel)       | Republic of the Congo, Gabon, Central African Republic, Cameroon, Democratic Republic of the Congo, Guinea                                                              | Anthony et al. 2017a, Maganga et al. 2014, Lacroix et al. 2020                                                                                                                                                | Yes |
| <b>Genus Myonycteris</b>     |                                        | <b>1/5</b>                      | <b>832</b>  |                                         |                                                                                                                                                                         |                                                                                                                                                                                                               |     |
|                              | Myonycteris angolensis                 | Yes                             | 212         | BetaCoV (Novel; Nobecovirus)            | Rwanda, Kenya, Ghana, Cameroon, Republic of Congo, Uganda, Guinea)                                                                                                      | Nziza et al. 2019; Anthony et al. 2017a, Corman et al. 2015, Tao et al. 2017, Tong et al., 2009, Lacroix et al. 2020                                                                                          | Yes |
|                              | Myonycteris brachycephala              | -                               | -           |                                         |                                                                                                                                                                         |                                                                                                                                                                                                               | Yes |
|                              | Myonycteris leptodon                   | -                               | -           |                                         |                                                                                                                                                                         |                                                                                                                                                                                                               |     |
|                              | Myonycteris relictata                  | -                               | -           |                                         |                                                                                                                                                                         |                                                                                                                                                                                                               |     |
|                              | Myonycteris torquata                   | No                              | 616         | -                                       | Republic of the Congo, Gabon, Central African Republic, Cameroon, Democratic Republic of the Congo                                                                      | Maganga et al. 2014, Anthony et al. 2017a                                                                                                                                                                     |     |
|                              | not determined to species level (spp.) | Yes                             | 4           | BetaCoV (Nobecovirus)                   | Democratic Republic of the Congo, Republic of Congo                                                                                                                     | Anthony et al. 2017a                                                                                                                                                                                          |     |
| <b>Genus Nanonycteris</b>    |                                        | <b>1/1</b>                      | <b>6</b>    |                                         |                                                                                                                                                                         |                                                                                                                                                                                                               |     |
|                              | Nanonycteris veldkampii                | Yes                             | 6           | BetaCoV (Nobecovirus)                   | Cameroon, Guinea                                                                                                                                                        | Anthony et al. 2017a, Lacroix et al. 2020                                                                                                                                                                     |     |
| <b>Genus Plerotes</b>        |                                        | <b>0/1</b>                      | <b>4</b>    |                                         |                                                                                                                                                                         |                                                                                                                                                                                                               |     |
|                              | Plerotes anchietae                     | No                              | 4           | -                                       | Uganda                                                                                                                                                                  | Anthony et al. 2017a                                                                                                                                                                                          |     |
| <b>Genus Rousettus</b>       |                                        | <b>2/3</b>                      | <b>3315</b> |                                         |                                                                                                                                                                         |                                                                                                                                                                                                               |     |
|                              | Rousettus aegyptiacus                  | Yes                             | 3129        | AlphaCoV (Novel); BetaCoV (Nobecovirus) | Kenya, Egypt, Cameroon, Rwanda, South Africa, Gabon, Republic of the Congo, Central African Republic, Ghana, Democratic Republic of the Congo, Tanzania, Uganda, Guinea | Corman et al. 2015, Geldenhuys et al. 2013, Ithete et al. 2013, Maganga et al. 2014, Markotter et al. 2019, Tong et al. 2009, Tao et al. 2017, Anthony et al. 2017a, Maganga et al. 2020, Lacroix et al. 2020 | Yes |
|                              | Rousettus madagascariensis             | Yes                             | 186         | BetaCoV (Nobecovirus)                   | Madagascar                                                                                                                                                              | Razanajatovo et al. 2015, Joffrin et al. 2020                                                                                                                                                                 | Yes |
|                              | Rousettus obliviosus                   | -                               | -           |                                         |                                                                                                                                                                         |                                                                                                                                                                                                               |     |
| <b>Genus Scotonycteris</b>   |                                        | <b>0/3</b>                      | <b>6</b>    |                                         |                                                                                                                                                                         |                                                                                                                                                                                                               |     |
|                              | Scotonycteris bergmansi                | -                               | -           |                                         |                                                                                                                                                                         |                                                                                                                                                                                                               |     |
|                              | Scotonycteris occidentalis             | -                               | -           |                                         |                                                                                                                                                                         |                                                                                                                                                                                                               |     |
|                              | Scotonycteris zenkeri                  | No                              | 6           | -                                       | Cameroon                                                                                                                                                                | Anthony et al. 2017a                                                                                                                                                                                          |     |
| <b>Genus Stenonycteris</b>   |                                        | <b>0/1</b>                      | <b>22</b>   |                                         |                                                                                                                                                                         |                                                                                                                                                                                                               |     |
|                              | Stenonycteris lanosus                  | No                              | 22          | -                                       | Rwanda                                                                                                                                                                  | Nziza et al. 2019; Anthony et al. 2017a                                                                                                                                                                       | Yes |
| <b>FAMILY Hipposideridae</b> |                                        | 8/21 (10 tested; 11 not tested) | <b>8563</b> |                                         |                                                                                                                                                                         |                                                                                                                                                                                                               |     |
| <b>Genus Asellia</b>         |                                        | <b>0/3</b>                      | <b>0</b>    |                                         |                                                                                                                                                                         |                                                                                                                                                                                                               |     |
|                              | Asellia italosomalia                   | -                               | -           |                                         |                                                                                                                                                                         |                                                                                                                                                                                                               |     |
|                              | Asellia patrizii                       | -                               | -           |                                         |                                                                                                                                                                         |                                                                                                                                                                                                               |     |

|                            |                                        |                                        |             |                                                             |                                                                                                               |                                                                                                                                                                                                                |     |
|----------------------------|----------------------------------------|----------------------------------------|-------------|-------------------------------------------------------------|---------------------------------------------------------------------------------------------------------------|----------------------------------------------------------------------------------------------------------------------------------------------------------------------------------------------------------------|-----|
|                            | Asellia tridens                        | -                                      | -           |                                                             |                                                                                                               |                                                                                                                                                                                                                |     |
| <b>Genus Doryrhina</b>     |                                        | <b>0/1</b>                             | <b>0</b>    |                                                             |                                                                                                               |                                                                                                                                                                                                                |     |
|                            | Doryrhina cyclops                      | -                                      | -           |                                                             |                                                                                                               |                                                                                                                                                                                                                |     |
| <b>Genus Hipposideros</b>  |                                        | <b>5/13</b>                            | <b>7366</b> |                                                             |                                                                                                               |                                                                                                                                                                                                                |     |
|                            | Hipposideros abae                      | Yes                                    | 620         | AlphaCoV (Duvinavirus)                                      | Ghana                                                                                                         | Corman et al. 2015, Pfefferle et al., 2009, Annan et al. 2013                                                                                                                                                  |     |
|                            | Hipposideros beatus                    | No                                     | 3           | -                                                           | Cameroon, Republic of Congo                                                                                   | Anthony et al. 2017a,                                                                                                                                                                                          |     |
|                            | Hipposideros caffer                    | Yes                                    | 1181        | AlphaCoV (Duvinavirus); BetaCoV (Hibecovirus)               | Kenya, Cameroon, South Africa, Democratic Republic of the Congo, Gabon, Republic of Congo, Rwanda, Mozambique | Waruhiu et al. 2017, Anthony et al. 2017a, Geldenhuys et al. 2013, Ithete et al. 2013, Nziza et al. 2019, Joffrin et al. 2020                                                                                  |     |
|                            | Hipposideros camerunensis              | -                                      | -           |                                                             |                                                                                                               |                                                                                                                                                                                                                |     |
|                            | Hipposideros cf. centralis             | -                                      | -           |                                                             |                                                                                                               |                                                                                                                                                                                                                |     |
|                            | Hipposideros curtus                    | Yes                                    | 7           | AlphaCoV (Duvinavirus)                                      | Cameroon                                                                                                      | Anthony et al. 2017a                                                                                                                                                                                           |     |
|                            | Hipposideros fuliginosus               | Yes                                    | 7           | Unknown                                                     | Ghana, Cameroon                                                                                               | Annan et al. 2013, Anthony et al. 2017a                                                                                                                                                                        |     |
|                            | Hipposideros jonesi                    | No                                     | 31          | -                                                           | Ghana                                                                                                         | Annan et al. 2013                                                                                                                                                                                              | Yes |
|                            | Hipposideros lamottei                  | -                                      | -           |                                                             |                                                                                                               |                                                                                                                                                                                                                | Yes |
|                            | Hipposideros marisae                   | -                                      | -           |                                                             |                                                                                                               |                                                                                                                                                                                                                | Yes |
|                            | Hipposideros megalotis                 | -                                      | -           |                                                             |                                                                                                               |                                                                                                                                                                                                                |     |
|                            | Hipposideros ruber                     | Yes                                    | 5213        | AlphaCoV (Duvinavirus); BetaCoV (Sarbecovirus, Hibecovirus) | Ghana, Gabon, Republic of Congo, Kenya, Rwanda, Cameroon, Democratic Republic of the Congo, Uganda, Guinea    | Pfefferle et al. 2009, Corman et al. 2015, Maganga et al. 2014, Tong et al., 2009, Annan et al. 2013, Markotter et al. 2019, Nziza et al. 2019; Anthony et al. 2017a, Maganga et al. 2020, Lacroix et al. 2020 | Yes |
|                            | Hipposideros tephrus                   | -                                      | -           |                                                             |                                                                                                               |                                                                                                                                                                                                                |     |
|                            | not determined to species level (spp.) | Yes                                    | 304         | AlphaCoV (Duvinavirus); BetaCoV (Hibecovirus)               | Zimbabwe, Kenya, Republic of Congo, Cameroon, Democratic Republic of the Congo, Gabon, Uganda                 | Bourgarel et al. 2018, Tao et al. 2017, Anthony et al. 2017a                                                                                                                                                   |     |
| <b>Genus Macronycteris</b> |                                        | <b>3/4</b>                             | <b>1197</b> |                                                             |                                                                                                               |                                                                                                                                                                                                                |     |
|                            | Macronycteris commersoni               | Yes                                    | 70          | AlphaCoV (Novel)                                            | Cameroon, Madagascar                                                                                          | Anthony et al. 2017a, Joffrin et al. 2020                                                                                                                                                                      | Yes |
|                            | Macronycteris cryptovalorona           | -                                      | -           |                                                             |                                                                                                               |                                                                                                                                                                                                                |     |
|                            | Macronycteris gigas                    | Yes                                    | 1004        | AlphaCoV (Novel), BetaCoV (Hibecovirus, Nobecovirus)        | Ghana, Gabon, Central African Republic, Nigeria, Cameroon, Republic of Congo                                  | Annan et al. 2013, Maganga et al. 2014, Quan et al. 2010, Tong et al. 2009, Anthony et al. 2017a, Maganga et al. 2020                                                                                          | Yes |
|                            | Macronycteris vittatus                 | Yes                                    | 123         | AlphaCoV (Duvinavirus)                                      | Kenya                                                                                                         | Tao et al. 2017                                                                                                                                                                                                | Yes |
| <b>FAMILY Molossidae</b>   |                                        | <b>8/44 (16 tested; 28 not tested)</b> | <b>2144</b> |                                                             |                                                                                                               |                                                                                                                                                                                                                |     |
| <b>Genus Chaerephon</b>    |                                        | <b>2/15</b>                            | <b>601</b>  |                                                             |                                                                                                               |                                                                                                                                                                                                                |     |
|                            | Chaerephon aloysiabauidiae             | -                                      | -           |                                                             |                                                                                                               |                                                                                                                                                                                                                |     |
|                            | Chaerephon ansorgei                    | -                                      | -           |                                                             |                                                                                                               |                                                                                                                                                                                                                | Yes |
|                            | Chaerephon atsinanana                  | No                                     | 29          | -                                                           | Madagascar                                                                                                    | Joffrin et al. 2020                                                                                                                                                                                            |     |
|                            | Chaerephon bemmeleni                   | -                                      | -           |                                                             |                                                                                                               |                                                                                                                                                                                                                |     |
|                            | Chaerephon bivittatus                  | -                                      | -           |                                                             |                                                                                                               |                                                                                                                                                                                                                |     |
|                            | Chaerephon chapini                     | -                                      | -           |                                                             |                                                                                                               |                                                                                                                                                                                                                |     |
|                            | Chaerephon gallagheri                  | -                                      | -           |                                                             |                                                                                                               |                                                                                                                                                                                                                |     |
|                            | Chaerephon jobimena                    | -                                      | -           |                                                             |                                                                                                               |                                                                                                                                                                                                                | Yes |
|                            | Chaerephon leucogaster                 | No                                     | 45          | -                                                           | Madagascar                                                                                                    | Joffrin et al. 2020                                                                                                                                                                                            |     |
|                            | Chaerephon major                       | No                                     | 1           | -                                                           | Cameroon                                                                                                      | Anthony et al. 2017a                                                                                                                                                                                           |     |
|                            | Chaerephon nigeriae                    | -                                      | -           |                                                             |                                                                                                               |                                                                                                                                                                                                                |     |

|                                      |                                        |            |             |                                                       |                                                                                                                                                    |                                                                                                                                             |
|--------------------------------------|----------------------------------------|------------|-------------|-------------------------------------------------------|----------------------------------------------------------------------------------------------------------------------------------------------------|---------------------------------------------------------------------------------------------------------------------------------------------|
|                                      | Chaerephon pumilus                     | Yes        | 355         | AlphaCoV (Novel)                                      | Kenya, South Africa, Tanzania, Republic of the Congo, Rwanda, Cameroon, Democratic Republic of the Congo, Uganda                                   | Geldenhuys et al. 2013, Ithete et al. 2013, Tao et al. 2017, Tong et al. 2009, Waruhiu et al. 2017, Anthony et al. 2017a, Nziza et al. 2019 |
|                                      | Chaerephon pusillus                    | Yes        | 60          | AlphaCoV (Novel)                                      | Mayotte                                                                                                                                            | Joffrin et al. 2020                                                                                                                         |
|                                      | Chaerephon russatus                    | -          | -           |                                                       |                                                                                                                                                    |                                                                                                                                             |
|                                      | Chaerephon tomensis                    | -          | -           |                                                       |                                                                                                                                                    | Yes                                                                                                                                         |
|                                      | not determined to species level (spp.) | Yes        | 171         | AlphaCoV (Novel); BetaCoV (Sarbecovirus, Nobecovirus) | Kenya, South Africa, Ghana, Democratic Republic of the Congo, Mayotte, Guinea                                                                      | Tong et al. 2009, Tao et al. 2017, Pfefferle et al. 2009, Anthony et al. 2017a, Joffrin et al. 2020, Lacroix et al. 2020                    |
| <b>Genus Mops</b>                    |                                        |            |             |                                                       |                                                                                                                                                    |                                                                                                                                             |
| <b>Subgenus Mops (Mops)</b>          |                                        | <b>2/8</b> | <b>1012</b> |                                                       |                                                                                                                                                    |                                                                                                                                             |
|                                      | Mops (Mops) condylurus                 | Yes        | 858         | AlphaCoV (Novel); BetaCoV (Novel, Nobecovirus-like)   | Kenya, Cameroon, South Africa, Central African Republic, Rwanda, Democratic Republic of the Congo, Republic of Congo, Tanzania, Mozambique, Guinea | Waruhiu et al. 2017, Anthony et al. 2017a, Joffrin et al. 2020, Lacroix et al. 2020                                                         |
|                                      | Mops (Mops) conigicus                  | -          | -           |                                                       |                                                                                                                                                    |                                                                                                                                             |
|                                      | Mops (Mops) demonstrator               | No         | 7           | -                                                     | Cameroon                                                                                                                                           | Anthony et al. 2017a                                                                                                                        |
|                                      | Mops (Mops) leucostigma                | No         | 94          | -                                                     | Madagascar                                                                                                                                         | Joffrin et al. 2020 Yes                                                                                                                     |
|                                      | Mops (Mops) midas                      | Yes        | 23          | AlphaCoV (Novel)                                      | South Africa; Madagascar                                                                                                                           | Geldenhuys et al. 2013, Joffrin et al. 2020 Yes                                                                                             |
|                                      | Mops (Mops) niangarae                  | -          | -           |                                                       |                                                                                                                                                    |                                                                                                                                             |
|                                      | Mops (Mops) niveiventer                | -          | -           |                                                       |                                                                                                                                                    |                                                                                                                                             |
|                                      | Mops (Mops) trevori                    | -          | -           |                                                       |                                                                                                                                                    |                                                                                                                                             |
|                                      | not determined to species level (spp.) | No         | 30          | -                                                     | Democratic Republic of the Congo, Republic of Congo                                                                                                | Anthony et al. 2017a                                                                                                                        |
| <b>Subgenus Mops (Xiphonycteris)</b> |                                        |            |             |                                                       |                                                                                                                                                    |                                                                                                                                             |
|                                      | Mops (Xiphonycteris) bakarii           | -          | -           |                                                       |                                                                                                                                                    |                                                                                                                                             |
|                                      | Mops (Xiphonycteris) brachypterus      | No         | 2           | -                                                     | Democratic Republic of the Congo                                                                                                                   | Anthony et al. 2017a                                                                                                                        |
|                                      | Mops (Xiphonycteris) nanulus           | -          | -           |                                                       |                                                                                                                                                    |                                                                                                                                             |
|                                      | Mops (Xiphonycteris) petersoni         | -          | -           |                                                       |                                                                                                                                                    |                                                                                                                                             |
|                                      | Mops (Xiphonycteris) spurrelli         | -          | -           |                                                       |                                                                                                                                                    |                                                                                                                                             |
|                                      | Mops (Xiphonycteris) thersites         | -          | -           |                                                       |                                                                                                                                                    |                                                                                                                                             |
| <b>Genus Mormopterus</b>             |                                        |            |             |                                                       |                                                                                                                                                    |                                                                                                                                             |
|                                      | Mormopterus acetabulosus               | No         | 6           | -                                                     | Mauritius                                                                                                                                          | Joffrin et al. 2020                                                                                                                         |
|                                      | Mormopterus francoismoutoui            | Yes        | 50          | AlphaCoV (Novel)                                      | Reunion Island                                                                                                                                     | Joffrin et al. 2020                                                                                                                         |
|                                      | Mormopterus jugularis                  | Yes        | 63          | AlphaCoV (Novel)                                      | Madagascar                                                                                                                                         | Joffrin et al. 2020 Yes                                                                                                                     |
| <b>Genus Myopterus</b>               |                                        |            |             |                                                       |                                                                                                                                                    |                                                                                                                                             |
|                                      | Myopterus daubentonii                  | -          | -           |                                                       |                                                                                                                                                    |                                                                                                                                             |
|                                      | Myopterus whiteleyi                    | -          | -           |                                                       |                                                                                                                                                    |                                                                                                                                             |
| <b>Genus Otomops</b>                 |                                        |            |             |                                                       |                                                                                                                                                    |                                                                                                                                             |
|                                      | Otomops harrisoni                      | -          | -           |                                                       |                                                                                                                                                    |                                                                                                                                             |
|                                      | Otomops madagascariensis               | No         | 18          | -                                                     | Madagascar                                                                                                                                         | Joffrin et al. 2020                                                                                                                         |
|                                      | Otomops martiensseni                   | Yes        | 321         | AlphaCoV (Novel)                                      | Rwanda, Kenya                                                                                                                                      | Markotter et al. 2019, Nziza et al. 2019, Tong et al. 2009, Tao et al. 2017, Waruhiu et al. 2017, Anthony et al. 2017a                      |
| <b>Genus Platymops</b>               |                                        |            |             |                                                       |                                                                                                                                                    |                                                                                                                                             |
|                                      | Platymops setiger                      | -          | -           |                                                       |                                                                                                                                                    |                                                                                                                                             |
| <b>Genus Sauromys</b>                |                                        |            |             |                                                       |                                                                                                                                                    |                                                                                                                                             |
|                                      | Sauromys petrophilus                   | -          | -           |                                                       |                                                                                                                                                    |                                                                                                                                             |
| <b>Genus Tadarida</b>                |                                        |            |             |                                                       |                                                                                                                                                    |                                                                                                                                             |
|                                      | Tadarida aegyptiaca                    | No         | 7           | -                                                     | South Africa                                                                                                                                       | Geldenhuys et al. 2013, Ithete et al. 2013                                                                                                  |
|                                      | Tadarida fulminans                     | -          | -           |                                                       |                                                                                                                                                    |                                                                                                                                             |
|                                      | Tadarida lobata                        | -          | -           |                                                       |                                                                                                                                                    |                                                                                                                                             |
|                                      | Tadarida teniotis                      | -          | -           |                                                       |                                                                                                                                                    |                                                                                                                                             |

|                                        |                                        |                                  |             |                                   |                                                                    |                                                                                                   |
|----------------------------------------|----------------------------------------|----------------------------------|-------------|-----------------------------------|--------------------------------------------------------------------|---------------------------------------------------------------------------------------------------|
| Tadarida ventralis                     |                                        | -                                | -           |                                   |                                                                    |                                                                                                   |
| not determined to species level (spp.) |                                        | Yes                              | 64          | AlphaCoV (Novel); BetaCoV (Novel) | Tanzania, Uganda                                                   | Anthony et al. 2017a                                                                              |
| <b>FAMILY Miniopteridae</b>            |                                        | 5/22 (12 tested; 10 not tested)  | 1464        |                                   |                                                                    |                                                                                                   |
| <b>Genus Miniopterus</b>               |                                        | <b>5/22</b>                      | <b>1464</b> |                                   |                                                                    |                                                                                                   |
|                                        | Miniopterus aelleni                    | -                                | -           |                                   |                                                                    |                                                                                                   |
|                                        | Miniopterus africanus                  | Yes                              | 9           | AlphaCoV (Novel)                  | Kenya                                                              | Tong et al. 2009, Tao et al. 2017                                                                 |
|                                        | Miniopterus ambohitrensis              | -                                | -           |                                   |                                                                    |                                                                                                   |
|                                        | Miniopterus brachytragos               | -                                | -           |                                   |                                                                    |                                                                                                   |
|                                        | Miniopterus egeri                      | -                                | -           |                                   |                                                                    |                                                                                                   |
|                                        | Miniopterus fraterculus                | -                                | -           |                                   |                                                                    |                                                                                                   |
|                                        | Miniopterus gleni                      | No                               | 16          | -                                 | Madagascar                                                         | Joffrin et al. 2020 Yes                                                                           |
|                                        | Miniopterus griffithsi                 | -                                | -           |                                   |                                                                    |                                                                                                   |
|                                        | Miniopterus griveaudi                  | No                               | 28          | -                                 | Madagascar                                                         | Joffrin et al. 2020                                                                               |
|                                        | Miniopterus inflatus                   | Yes                              | 653         | AlphaCoV (Novel)                  | Kenya, Gabon, Cameroon, Republic of Congo                          | Tong et al. 2009, Tao et al. 2017, Maganga et al. 2014, Anthony et al. 2017a, Maganga et al. 2020 |
|                                        | Miniopterus maghrebenensis             | No                               | 7           | -                                 | Morocco                                                            | Ar Gouilh et al. 2018                                                                             |
|                                        | Miniopterus mahafaliensis              | No                               | 8           | -                                 | Madagascar                                                         | Joffrin et al. 2020                                                                               |
|                                        | Miniopterus majori                     | -                                | -           |                                   |                                                                    | Yes                                                                                               |
|                                        | Miniopterus manavi                     | No                               | 19          | -                                 | Madagascar                                                         | Joffrin et al. 2020 Yes                                                                           |
|                                        | Miniopterus minor                      | Yes                              | 311         | AlphaCoV (Novel)                  | Kenya, Tanzania                                                    | Tong et al. 2009, Tao et al. 2017, Waruhiu et al. 2017, Anthony et al. 2017a                      |
|                                        | Miniopterus mossambicus                | Yes                              | 21          | AlphaCoV (Novel)                  | Mozambique                                                         | Joffrin et al. 2020                                                                               |
|                                        | Miniopterus natalensis                 | Yes                              | 87          | AlphaCoV (Novel)                  | Kenya, South Africa                                                | Tong et al. 2009, Tao et al. 2017, Waruhiu et al. 2017, Ithete et al. 2013                        |
|                                        | Miniopterus newtoni                    | -                                | -           |                                   |                                                                    | Yes                                                                                               |
|                                        | Miniopterus petersoni                  | -                                | -           |                                   |                                                                    |                                                                                                   |
|                                        | Miniopterus schreibersii               | No                               | 1           | -                                 | Cameroon                                                           | Anthony et al. 2017a                                                                              |
|                                        | Miniopterus sororculus                 | No                               | 8           | -                                 | Madagascar                                                         | Joffrin et al. 2020                                                                               |
|                                        | Miniopterus villiersi                  | -                                | -           |                                   |                                                                    |                                                                                                   |
|                                        | not determined to species level (spp.) | Yes                              | 317         | AlphaCoV (Novel)                  | Kenya, Democratic Republic of the Congo, Republic of Congo, Rwanda | Tao et al. 2017, Anthony et al. 2017a                                                             |
| <b>FAMILY Vespertilionidae</b>         |                                        | 9/114 (37 tested; 77 not tested) | 918         |                                   |                                                                    |                                                                                                   |
| <b>Genus Kerivoula</b>                 |                                        | <b>0/7</b>                       | <b>10</b>   |                                   |                                                                    |                                                                                                   |
|                                        | Kerivoula africana                     | -                                | -           |                                   |                                                                    |                                                                                                   |
|                                        | Kerivoula argentata                    | No                               | 1           | -                                 | Republic of Congo                                                  | Anthony et al. 2017a                                                                              |
|                                        | Kerivoula cuprosa                      | No                               | 5           | -                                 |                                                                    |                                                                                                   |
|                                        | Kerivoula eriophora                    | -                                | -           |                                   |                                                                    |                                                                                                   |
|                                        | Kerivoula lanosa                       | No                               | 1           | -                                 | Democratic Republic of the Congo                                   | Anthony et al. 2017a                                                                              |
|                                        | Kerivoula phalaena                     | -                                | -           |                                   |                                                                    |                                                                                                   |
|                                        | Kerivoula smithii                      | -                                | -           |                                   |                                                                    |                                                                                                   |
|                                        | not determined to species level (spp.) | No                               | 3           | -                                 | Cameroon, Democratic Republic of the Congo                         | Anthony et al. 2017a                                                                              |
| <b>Genus Myotis</b>                    |                                        | <b>2/13</b>                      | <b>289</b>  |                                   |                                                                    |                                                                                                   |
|                                        | Myotis anjouanensis                    | -                                | -           |                                   |                                                                    |                                                                                                   |
|                                        | Myotis bocagii                         | -                                | -           |                                   |                                                                    |                                                                                                   |
|                                        | Myotis capaccinii                      | -                                | -           |                                   |                                                                    |                                                                                                   |
|                                        | Myotis dieteri                         | -                                | -           |                                   |                                                                    |                                                                                                   |
|                                        | Myotis emarginatus                     | -                                | -           |                                   |                                                                    |                                                                                                   |
|                                        | Myotis goudoti                         | No                               | 17          | -                                 | Madagascar                                                         | Joffrin et al. 2020                                                                               |
|                                        | Myotis morrisi                         | -                                | -           |                                   |                                                                    | Yes                                                                                               |

|                             |                                        |             |            |                                              |                                                                 |                                                                                                          |
|-----------------------------|----------------------------------------|-------------|------------|----------------------------------------------|-----------------------------------------------------------------|----------------------------------------------------------------------------------------------------------|
|                             | Myotis mystacinus                      | -           | -          |                                              |                                                                 | Yes                                                                                                      |
|                             | Myotis punicus                         | Yes         | 11         | AlphaCoV (Novel)                             | Morocco, Tunisia                                                | Ar Gouilh et al. 2018                                                                                    |
|                             | Myotis scotti                          | -           | -          |                                              |                                                                 |                                                                                                          |
|                             | Myotis tricolor                        | -           | -          |                                              |                                                                 |                                                                                                          |
|                             | Myotis welwitschii                     | Yes         | 257        | AlphaCoV (Novel)                             | Rwanda, Uganda                                                  | Anthony et al. 2017a                                                                                     |
|                             | Myotis zenatius                        | -           | -          |                                              |                                                                 |                                                                                                          |
|                             | not determined to species level (spp.) | No          | 4          | -                                            | Uganda                                                          | Anthony et al. 2017a                                                                                     |
| <b>Genus Scotophilus</b>    |                                        | <b>3/16</b> | <b>213</b> |                                              |                                                                 |                                                                                                          |
|                             | Scotophilus altilis                    | -           | -          |                                              |                                                                 |                                                                                                          |
|                             | Scotophilus andrewreborii              | -           | -          |                                              |                                                                 |                                                                                                          |
|                             | Scotophilus borbonicus                 | -           | -          |                                              |                                                                 |                                                                                                          |
|                             | Scotophilus dinganii                   | Yes         | 66         | AlphaCoV (Novel); BetaCoV (Novel)            | Kenya, Cameroon, Democratic Republic of the Congo, South Africa | Anthony et al. 2017a, Geldenhuys et al. 2013                                                             |
|                             | Scotophilus ejetai                     | -           | -          |                                              |                                                                 |                                                                                                          |
|                             | Scotophilus leucogaster                | Yes         | 38         | AlphaCoV (Novel), BetaCoV (Nobecovirus-like) | South Africa, Cameroon, Guinea                                  | Anthony et al. 2017a, Geldenhuys et al. 2013, Lacroix et al. 2020                                        |
|                             | Scotophilus livingstonii               | -           | -          |                                              |                                                                 |                                                                                                          |
|                             | Scotophilus marovaza                   | -           | -          |                                              |                                                                 |                                                                                                          |
|                             | Scotophilus nigrita                    | -           | -          |                                              |                                                                 |                                                                                                          |
|                             | Scotophilus nigritellus                | -           | -          |                                              |                                                                 |                                                                                                          |
|                             | Scotophilus nucella                    | -           | -          |                                              |                                                                 |                                                                                                          |
|                             | Scotophilus nux                        | Yes         | 3          | AlphaCoV (Novel),                            | Cameroon                                                        | Anthony et al. 2017a                                                                                     |
|                             | Scotophilus robustus                   | -           | -          |                                              |                                                                 | Yes                                                                                                      |
|                             | Scotophilus tandrefana                 | -           | -          |                                              |                                                                 |                                                                                                          |
|                             | Scotophilus trujilloi                  | -           | -          |                                              |                                                                 |                                                                                                          |
|                             | Scotophilus viridis                    | No          | 11         | -                                            | South Africa, Rwanda, Mozambique                                | Nziza et al. 2019, Anthony et al. 2017a, Geldenhuys et al. 2013, Ithete et al. 2013, Joffrin et al. 2020 |
|                             | not determined to species level (spp.) | No          | 95         | -                                            | South Africa, Democratic Republic of the Congo                  | Geldenhuys et al. 2013, Anthony et al. 2017a                                                             |
| <b>Genus Barbastella</b>    |                                        | <b>0/2</b>  | <b>0</b>   |                                              |                                                                 |                                                                                                          |
|                             | Barbastella barbastellus               | -           | -          |                                              |                                                                 |                                                                                                          |
|                             | Barbastella leucomelas                 | -           | -          |                                              |                                                                 |                                                                                                          |
| <b>Genus Eptesicus</b>      |                                        | <b>0/5</b>  | <b>4</b>   |                                              |                                                                 |                                                                                                          |
|                             | Eptesicus bottae                       | -           | -          |                                              |                                                                 |                                                                                                          |
|                             | Eptesicus floweri                      | -           | -          |                                              |                                                                 |                                                                                                          |
|                             | Eptesicus hottentotus                  | No          | 2          | -                                            | South Africa                                                    | Geldenhuys et al. 2013                                                                                   |
|                             | Eptesicus isabellinus                  | No          | 2          | -                                            | Tunisia                                                         | Ar Gouilh et al. 2018                                                                                    |
|                             | Eptesicus platyops                     | -           | -          |                                              |                                                                 |                                                                                                          |
| <b>Genus Glauconycteris</b> |                                        | <b>0/13</b> | <b>7</b>   |                                              |                                                                 |                                                                                                          |
|                             | Glauconycteris alboguttata             | No          | 1          | -                                            | Republic of Congo                                               | Anthony et al. 2017a                                                                                     |
|                             | Glauconycteris argentata               | -           | -          |                                              |                                                                 |                                                                                                          |
|                             | Glauconycteris atra                    | -           | -          |                                              |                                                                 |                                                                                                          |
|                             | Glauconycteris beatrix                 | No          | 3          | -                                            | South Africa, Ghana, Republic of Congo                          | Geldenhuys et al. 2013, Pfefferle et al. 2009, Anthony et al. 2017a                                      |
|                             | Glauconycteris curryae                 | -           | -          |                                              |                                                                 |                                                                                                          |
|                             | Glauconycteris egeria                  | -           | -          |                                              |                                                                 |                                                                                                          |
|                             | Glauconycteris gleni                   | -           | -          |                                              |                                                                 |                                                                                                          |
|                             | Glauconycteris humeralis               | -           | -          |                                              |                                                                 |                                                                                                          |
|                             | Glauconycteris kenyaicola              | -           | -          |                                              |                                                                 |                                                                                                          |
|                             | Glauconycteris machadoi                | -           | -          |                                              |                                                                 |                                                                                                          |
|                             | Glauconycteris poensis                 | No          | 2          | -                                            | Cameroon                                                        | Anthony et al. 2017a                                                                                     |
|                             | Glauconycteris superba                 | -           | -          |                                              |                                                                 |                                                                                                          |
|                             | Glauconycteris variegata               | No          | 1          | -                                            | Democratic Republic of the Congo                                | Anthony et al. 2017a                                                                                     |
| <b>Genus Hypsugo</b>        |                                        | <b>0/8</b>  | <b>7</b>   |                                              |                                                                 |                                                                                                          |
|                             | Hypsugo anchietae                      | -           | -          |                                              |                                                                 |                                                                                                          |
|                             | Hypsugo ariel                          | -           | -          |                                              |                                                                 |                                                                                                          |
|                             | Hypsugo bemainty                       | -           | -          |                                              |                                                                 |                                                                                                          |



|                           |                                        |             |            |                                          |                                                                                                                   |                                                                                                               |
|---------------------------|----------------------------------------|-------------|------------|------------------------------------------|-------------------------------------------------------------------------------------------------------------------|---------------------------------------------------------------------------------------------------------------|
|                           | Hypsugo cf. eisenrauti                 | -           | -          |                                          |                                                                                                                   |                                                                                                               |
|                           | Hypsugo crassulus                      | No          | 1          | -                                        | Republic of Congo                                                                                                 | Anthony et al. 2017a                                                                                          |
|                           | Hypsugo eisenrauti                     | -           | -          |                                          |                                                                                                                   |                                                                                                               |
|                           | Hypsugo musciculus                     | No          | 6          | -                                        | Cameroon                                                                                                          | Anthony et al. 2017a                                                                                          |
|                           | Hypsugo savii                          | -           | -          |                                          |                                                                                                                   |                                                                                                               |
| <b>Genus Laephotis</b>    |                                        | <b>0/4</b>  | <b>0</b>   |                                          |                                                                                                                   |                                                                                                               |
|                           | Laephotis angolensis                   | -           | -          |                                          |                                                                                                                   |                                                                                                               |
|                           | Laephotis botswanae                    | -           | -          |                                          |                                                                                                                   |                                                                                                               |
|                           | Laephotis namibensis                   | -           | -          |                                          |                                                                                                                   |                                                                                                               |
|                           | Laephotis wintoni                      | -           | -          |                                          |                                                                                                                   |                                                                                                               |
| <b>Genus Mimetillus</b>   |                                        | <b>0/2</b>  | <b>1</b>   |                                          |                                                                                                                   |                                                                                                               |
|                           | Mimetillus moloneyi                    | No          | 1          |                                          | Republic of Congo                                                                                                 | Anthony et al. 2017a                                                                                          |
|                           | Mimetillus thomasi                     | -           | -          |                                          |                                                                                                                   |                                                                                                               |
| <b>Genus Neoromicia</b>   |                                        | <b>1/17</b> | <b>238</b> |                                          |                                                                                                                   |                                                                                                               |
|                           | Neoromicia aff. guineensis             | -           | -          |                                          |                                                                                                                   |                                                                                                               |
|                           | Neoromicia brunnea                     | No          | 1          | -                                        | Republic of Congo                                                                                                 | Anthony et al. 2017a                                                                                          |
|                           | Neoromicia capensis                    | Yes         | 65         | AlphaCoV (Novel); BetaCoV (Merbecovirus) | South Africa, Cameroon                                                                                            | Geldenhuys et al. 2013, Ithete et al. 2013, Geldenhuys et al. 2018, Anthony et al. 2017a                      |
|                           | Neoromicia guineensis                  | -           | -          |                                          |                                                                                                                   |                                                                                                               |
|                           | Neoromicia helios                      | No          | 8          | -                                        | South Africa                                                                                                      | Geldenhuys et al. 2013, Geldenhuys et al. 2018                                                                |
|                           | Neoromicia humbloti                    | -           | -          |                                          |                                                                                                                   |                                                                                                               |
|                           | Neoromicia isabella                    | -           | -          |                                          |                                                                                                                   |                                                                                                               |
|                           | Neoromicia malagasyensis               | No          | 2          | -                                        | Madagascar                                                                                                        | Joffrin et al. 2020                                                                                           |
|                           | Neoromicia matroka                     | No          | 4          | -                                        | Madagascar                                                                                                        | Joffrin et al. 2020                                                                                           |
|                           | Neoromicia nana                        | No          | 51         | -                                        | South Africa, Cameroon, Democratic Republic of the Congo, Republic of Congo, Rwanda, Tanzania, Uganda, Mozambique | Geldenhuys et al. 2013, Ithete et al. 2013, Geldenhuys et al. 2018, Anthony et al. 2017a, Joffrin et al. 2020 |
|                           | Neoromicia rendalli                    | No          | 2          |                                          | Democratic Republic of the Congo                                                                                  | Anthony et al. 2017a                                                                                          |
|                           | Neoromicia robertsi                    | -           | -          |                                          |                                                                                                                   |                                                                                                               |
|                           | Neoromicia roseveari                   | -           | -          |                                          |                                                                                                                   |                                                                                                               |
|                           | Neoromicia somalica                    | -           | -          |                                          |                                                                                                                   |                                                                                                               |
|                           | Neoromicia stanleyi                    | -           | -          |                                          |                                                                                                                   |                                                                                                               |
|                           | Neoromicia tenuipinnis                 | No          | 62         | -                                        | Kenya, Central African Republic, Rwanda, Cameroon, Republic of Congo                                              | Tong et al., 2009, Tao et al. 2017, Maganga et al. 2014, Nziza et al. 2019, Anthony et al. 2017a              |
|                           | Neoromicia zuluensis                   | No          | 7          | -                                        | South Africa, Rwanda                                                                                              | Geldenhuys et al. 2013, Geldenhuys et al. 2018, Nziza et al. 2019, Anthony et al. 2017a                       |
|                           | not determined to species level (spp.) | No          | 36         | -                                        | South Africa, Kenya                                                                                               | Geldenhuys et al. 2013, Tao et al. 2017                                                                       |
| <b>Genus Nyctalus</b>     |                                        | <b>0/3</b>  | <b>0</b>   |                                          |                                                                                                                   |                                                                                                               |
|                           | Nyctalus azoreum                       | -           | -          |                                          |                                                                                                                   |                                                                                                               |
|                           | Nyctalus lasiopterus                   | -           | -          |                                          |                                                                                                                   |                                                                                                               |
|                           | Nyctalus leisleri                      | -           | -          |                                          |                                                                                                                   |                                                                                                               |
| <b>Genus Nycticeinops</b> |                                        | <b>0/1</b>  | <b>12</b>  |                                          |                                                                                                                   |                                                                                                               |
|                           | Nycticeinops schlieffenii              | No          | 12         | -                                        | South Africa, Cameroon, Tanzania                                                                                  | Geldenhuys et al. 2013, Anthony et al. 2017a                                                                  |
| <b>Genus Otonycteris</b>  |                                        | <b>0/1</b>  | <b>0</b>   |                                          |                                                                                                                   |                                                                                                               |
|                           | Otonycteris hemprichii                 | -           | -          |                                          |                                                                                                                   |                                                                                                               |
| <b>Genus Pipistrellus</b> |                                        | <b>2/14</b> | <b>100</b> |                                          |                                                                                                                   |                                                                                                               |
|                           | Pipistrellus aero                      | -           | -          |                                          |                                                                                                                   |                                                                                                               |
|                           | Pipistrellus grandidieri               | -           | -          |                                          |                                                                                                                   |                                                                                                               |
|                           | Pipistrellus hanaki                    | -           | -          |                                          |                                                                                                                   |                                                                                                               |
|                           | Pipistrellus hesperidus                | Yes         | 2          | BetaCoV (Merbecovirus)                   | Uganda, Madagascar                                                                                                | Anthony et al. 2017b, Joffrin et al. 2020                                                                     |

|                             |                                        |                                 |            |                                          |                                                                      |                                                                                    |     |
|-----------------------------|----------------------------------------|---------------------------------|------------|------------------------------------------|----------------------------------------------------------------------|------------------------------------------------------------------------------------|-----|
|                             | Pipistrellus inexpectatus              | No                              | 4          | -                                        | Cameroon                                                             | Anthony et al. 2017a                                                               |     |
|                             | Pipistrellus kuhlii                    | Yes                             | 32         | BetaCoV (Nobecovirus-like)               | Ghana, Egypt                                                         | Pfefferle et al., 2009, Shehata et al. 2016,                                       |     |
|                             | Pipistrellus maderensis                | -                               | -          |                                          |                                                                      |                                                                                    |     |
|                             | Pipistrellus nanulus                   | No                              | 17         | -                                        | Ghana, Cameroon, Democratic Republic of the Congo, Republic of Congo | Pfefferle et al., 2009, Anthony et al. 2017a                                       |     |
|                             | Pipistrellus permixtus                 | -                               | -          |                                          |                                                                      |                                                                                    |     |
|                             | Pipistrellus pipistrellus              | -                               | -          |                                          |                                                                      |                                                                                    |     |
|                             | Pipistrellus pygmaeus                  | -                               | -          |                                          |                                                                      |                                                                                    |     |
|                             | Pipistrellus raceyi                    | -                               | -          |                                          |                                                                      |                                                                                    |     |
|                             | Pipistrellus rueppellii                | -                               | -          |                                          |                                                                      |                                                                                    |     |
|                             | Pipistrellus rusticus                  | No                              | 2          | -                                        | Cameroon                                                             | Anthony et al. 2017a                                                               |     |
|                             | not determined to species level (spp.) | No                              | 43         | -                                        | Kenya, Democratic Republic of the Congo, Republic of Congo           | Tong et al. 2009, Tao et al. 2017, Anthony et al. 2017a                            |     |
| <b>Genus Plecotus</b>       |                                        | <b>0/4</b>                      | <b>0</b>   |                                          |                                                                      |                                                                                    |     |
|                             | Plecotus balensis                      | -                               | -          |                                          |                                                                      |                                                                                    |     |
|                             | Plecotus christii                      | -                               | -          |                                          |                                                                      |                                                                                    |     |
|                             | Plecotus gaisleri                      | -                               | -          |                                          |                                                                      |                                                                                    |     |
|                             | Plecotus teneriffae                    | -                               | -          |                                          |                                                                      |                                                                                    |     |
| <b>Genus Scotoecus</b>      |                                        | <b>1/4</b>                      | <b>37</b>  |                                          |                                                                      |                                                                                    |     |
|                             | Scotoecus albigula                     | No                              | 8          | -                                        | Uganda                                                               | Anthony et al. 2017a                                                               |     |
|                             | Scotoecus albofuscus                   | No                              | 3          | -                                        | Uganda                                                               | Anthony et al. 2017a                                                               |     |
|                             | Scotoecus hindei                       | -                               | -          |                                          |                                                                      |                                                                                    |     |
|                             | Scotoecus hirundo                      | No                              | 1          | -                                        | Cameroon                                                             | Anthony et al. 2017a                                                               |     |
|                             | not determined to species level (spp.) | Yes                             | 25         | AlphaCoV (Novel)                         | Kenya, Tanzania                                                      | Tao et al. 2017, Anthony et al. 2017a                                              |     |
| <b>FAMILY Rhinolophidae</b> |                                        | 9/38 (14 tested; 24 not tested) | <b>728</b> |                                          |                                                                      |                                                                                    |     |
| <b>Genus Rhinolophus</b>    |                                        | <b>9/38</b>                     | <b>728</b> |                                          |                                                                      |                                                                                    |     |
|                             | Rhinolophus adami                      | -                               | -          |                                          |                                                                      |                                                                                    |     |
|                             | Rhinolophus alcyone                    | Yes                             | 25         | AlphaCoV (Novel)                         | Ghana, Gabon, Cameroon                                               | Annan et al. 2013, Maganga et al. 2014, Anthony et al. 2017a                       | Yes |
|                             | Rhinolophus blasii                     | -                               | -          |                                          |                                                                      |                                                                                    |     |
|                             | Rhinolophus capensis                   | No                              | 1          | -                                        | South Africa                                                         | Geldenhuys et al. 2013                                                             |     |
|                             | Rhinolophus clivovus                   | Yes                             | 79         | BetaCoV (Sarbecovirus; Hibecovirus)      | Rwanda, South Africa, Uganda                                         | Markotter et al. 2019; Nziza et al. 2019; Anthony et al. 2017a, Ithete et al. 2013 |     |
|                             | Rhinolophus cohenae                    | -                               | -          |                                          |                                                                      |                                                                                    |     |
|                             | Rhinolophus damarensis                 | -                               | -          |                                          |                                                                      |                                                                                    |     |
|                             | Rhinolophus darlingi                   | Yes                             | 8          | AlphaCoV (Novel)                         | South Africa, Guinea                                                 | Geldenhuys et al. 2013, Ithete et al. 2013, Lacroix et al. 2020                    |     |
|                             | Rhinolophus deckenii                   | -                               | -          |                                          |                                                                      |                                                                                    |     |
|                             | Rhinolophus denti                      | No                              | 5          | -                                        | South Africa                                                         | Geldenhuys et al. 2013                                                             |     |
|                             | Rhinolophus eloquens                   | No                              | 2          | -                                        | Rwanda                                                               | Anthony et al. 2017a                                                               |     |
|                             | Rhinolophus euryale                    | Yes                             | 3          | AlphaCoV (Novel)                         | Morocco                                                              | Ar Gouilh et al. 2018                                                              |     |
|                             | Rhinolophus ferrumequinum              | No                              | 2          | -                                        | Morocco                                                              | Ar Gouilh et al. 2018                                                              |     |
|                             | Rhinolophus fumigatus                  | Yes                             | 2          | AlphaCoV (Novel)                         | Kenya, Cameroon                                                      | Waruhiu et al. 2017, Anthony et al. 2017a                                          |     |
|                             | Rhinolophus gorongosae                 | -                               | -          |                                          |                                                                      |                                                                                    |     |
|                             | Rhinolophus guineensis                 | -                               | -          |                                          |                                                                      |                                                                                    | Yes |
|                             | Rhinolophus hildebrandtii              | Yes                             | 20         | AlphaCoV (Novel); BetaCoV (Sarbecovirus) | Kenya                                                                | Tao et al. 2017, Tong et al. 2009                                                  |     |
|                             | Rhinolophus hilli                      | -                               | -          |                                          |                                                                      |                                                                                    | Yes |
|                             | Rhinolophus hillorum                   | -                               | -          |                                          |                                                                      |                                                                                    | Yes |
|                             | Rhinolophus hipposideros               | -                               | -          |                                          |                                                                      |                                                                                    |     |
|                             | Rhinolophus horaceki                   | -                               | -          |                                          |                                                                      |                                                                                    |     |
|                             | Rhinolophus kahuzi                     | -                               | -          |                                          |                                                                      |                                                                                    |     |

|                                        |                               |            |                                          |                                                                                                             |                                                                                                                                                                   |     |
|----------------------------------------|-------------------------------|------------|------------------------------------------|-------------------------------------------------------------------------------------------------------------|-------------------------------------------------------------------------------------------------------------------------------------------------------------------|-----|
| Rhinolophus landeri                    | Yes                           | 92         | AlphaCoV (Novel)                         | Kenya, Ghana, South Africa, Cameroon                                                                        | Tao et al. 2017; Waruhiu et al. 2017, Geldenhuys et al. 2013, Annan et al. 2013, Anthony et al. 2017a                                                             |     |
| Rhinolophus lobatus                    | Yes                           | 9          | AlphaCoV (Novel)                         | Mozambique                                                                                                  | Joffrin et al. 2020                                                                                                                                               |     |
| Rhinolophus mabuensis                  | -                             | -          |                                          |                                                                                                             |                                                                                                                                                                   |     |
| Rhinolophus maclaudi                   | -                             | -          |                                          |                                                                                                             |                                                                                                                                                                   | Yes |
| Rhinolophus maendeleo                  | -                             | -          |                                          |                                                                                                             |                                                                                                                                                                   |     |
| Rhinolophus mehelyi                    | -                             | -          |                                          |                                                                                                             |                                                                                                                                                                   |     |
| Rhinolophus mossambicus                | No                            | 20         | -                                        | Mozambique                                                                                                  | Joffrin et al. 2020                                                                                                                                               |     |
| Rhinolophus rhodesiae                  | Yes                           | 30         | AlphaCoV (Novel)                         | Mozambique                                                                                                  | Joffrin et al. 2020                                                                                                                                               |     |
| Rhinolophus ruwenzorii                 | -                             | -          |                                          |                                                                                                             |                                                                                                                                                                   | Yes |
| Rhinolophus sakejensis                 | -                             | -          |                                          |                                                                                                             |                                                                                                                                                                   |     |
| Rhinolophus silvestris                 | -                             | -          |                                          |                                                                                                             |                                                                                                                                                                   | Yes |
| Rhinolophus simulator                  | -                             | -          |                                          |                                                                                                             |                                                                                                                                                                   |     |
| Rhinolophus smithersi                  | -                             | -          |                                          |                                                                                                             |                                                                                                                                                                   |     |
| Rhinolophus swinnyi                    | -                             | -          |                                          |                                                                                                             |                                                                                                                                                                   |     |
| Rhinolophus willardi                   | -                             | -          |                                          |                                                                                                             |                                                                                                                                                                   |     |
| Rhinolophus ziana                      | -                             | -          |                                          |                                                                                                             |                                                                                                                                                                   | Yes |
| not determined to species level (spp.) | Yes                           | 430        | AlphaCoV (Novel); BetaCoV (Sarbecovirus) | Kenya, Rwanda, South Africa, Democratic Republic of the Congo, Gabon, Republic of Congo, Uganda, Mozambique | Tao et al. 2017, Tao et al. 2019, Anthony et al. 2017a, Tong et al. 2009, Geldenhuys et al. 2013, Joffrin et al. 2020                                             |     |
|                                        |                               |            |                                          |                                                                                                             |                                                                                                                                                                   |     |
| <b>FAMILY Emballonuridae</b>           | 0/11 (4 tested; 7 not tested) | <b>678</b> |                                          |                                                                                                             |                                                                                                                                                                   |     |
| <b>Genus Coleura</b>                   | <b>0/3</b>                    | <b>550</b> |                                          |                                                                                                             |                                                                                                                                                                   |     |
| Coleura afra                           | No                            | 550        | -                                        | Kenya, Ghana, Gabon, Cameroon, Tanzania, Uganda                                                             | Tong et al., 2009; Tao et al. 2017, Pfefferle et al., 2009; Annan et al. 2013, Corman et al. 2015, Maganga et al. 2014, Anthony et al. 2017a, Maganga et al. 2020 |     |
| Coleura kibomalandy                    | -                             | -          |                                          |                                                                                                             |                                                                                                                                                                   |     |
| Coleura seychellensis                  | -                             | -          |                                          |                                                                                                             |                                                                                                                                                                   |     |
| <b>Genus Paremballonura</b>            | <b>0/2</b>                    | <b>0</b>   |                                          |                                                                                                             |                                                                                                                                                                   |     |
| Paremballonura atrata                  | -                             | -          |                                          |                                                                                                             |                                                                                                                                                                   | Yes |
| Paremballonura tiavato                 | -                             | -          |                                          |                                                                                                             |                                                                                                                                                                   |     |
| <b>Genus Saccolaimus</b>               | <b>0/1</b>                    | <b>0</b>   |                                          |                                                                                                             |                                                                                                                                                                   |     |
| Saccolaimus peli                       | -                             | -          |                                          |                                                                                                             |                                                                                                                                                                   |     |
| <b>Genus Taphozous</b>                 | <b>0/5</b>                    | <b>128</b> |                                          |                                                                                                             |                                                                                                                                                                   |     |
| Taphozous hamiltoni                    | -                             | -          |                                          |                                                                                                             |                                                                                                                                                                   |     |
| Taphozous hildegardae                  | No                            | 3          | -                                        | Kenya                                                                                                       | Tong et al., 2009;                                                                                                                                                |     |
| Taphozous mauritanus                   | No                            | 19         | -                                        | Cameroon, Democratic Republic of the Congo, Tanzania, Mauritius                                             | Anthony et al. 2017a, Joffrin et al. 2020                                                                                                                         | Yes |
| Taphozous nudiventris                  | -                             | -          |                                          |                                                                                                             |                                                                                                                                                                   |     |
| Taphozous perforatus                   | No                            | 103        | -                                        | Ghana, Egypt                                                                                                | Annan et al. 2013, Shehata et al. 2016                                                                                                                            |     |
| not determined to species level (spp.) | No                            | 3          | -                                        | Kenya, Tanzania                                                                                             | Tong et al., 2009, Anthony et al. 2017a                                                                                                                           |     |
|                                        |                               |            |                                          |                                                                                                             |                                                                                                                                                                   |     |
| <b>FAMILY Nycteridae</b>               | 3/15 (6 tested; 9 not tested) | <b>299</b> |                                          |                                                                                                             |                                                                                                                                                                   |     |
| <b>Genus Nycteris</b>                  | <b>2/15</b>                   | <b>299</b> |                                          |                                                                                                             |                                                                                                                                                                   |     |
| Nycteris arge                          | -                             | 3          | -                                        | Uganda                                                                                                      | Anthony et al. 2017a                                                                                                                                              |     |
| Nycteris aurita                        | -                             | -          |                                          |                                                                                                             |                                                                                                                                                                   |     |
| Nycteris cf. parisii                   | -                             | -          |                                          |                                                                                                             |                                                                                                                                                                   |     |
| Nycteris gambiensis                    | Yes                           | 185        | BetaCoV (Merbecovirus)                   | Ghana                                                                                                       | Annan et al. 2013                                                                                                                                                 |     |
| Nycteris grandis                       | No                            | 26         | -                                        | Cameroon                                                                                                    | Anthony et al. 2017a                                                                                                                                              | Yes |

|                                        |                              |            |                                          |                                                            |                                                                                       |
|----------------------------------------|------------------------------|------------|------------------------------------------|------------------------------------------------------------|---------------------------------------------------------------------------------------|
| Nycteris hispida                       | No                           | 34         | -                                        | Ghana, Rwanda, Cameroon, Republic of Congo                 | Pfefferle et al., 2009, Nziza et al. 2019, Anthony et al. 2017a                       |
| Nycteris intermedia                    | -                            | -          |                                          |                                                            |                                                                                       |
| Nycteris macrotis                      | Yes                          | 3          | BetaCoV (Merbecovirus)                   | Guinea                                                     | Lacroix et al. 2020                                                                   |
| Nycteris madagascariensis              | -                            | -          |                                          |                                                            |                                                                                       |
| Nycteris major                         | No                           | 1          | -                                        | Cameroon                                                   | Anthony et al. 2017a                                                                  |
| Nycteris nana                          | -                            | -          |                                          |                                                            |                                                                                       |
| Nycteris parisii                       | -                            | -          |                                          |                                                            |                                                                                       |
| Nycteris thebaica                      | Yes                          | 19         | BetaCoV (Merbecovirus)                   | South Africa, Cameroon, Mozambique                         | Geldenhuys et al. 2013, Ithete et al. 2013, Anthony et al. 2017a, Joffrin et al. 2020 |
| Nycteris vinsoni                       | -                            | -          |                                          |                                                            |                                                                                       |
| Nycteris woodi                         | -                            | -          |                                          |                                                            |                                                                                       |
| not determined to species level (spp.) | No                           | 28         | -                                        | Kenya, Democratic Republic of the Congo, Republic of Congo | Tao et al. 2017, Anthony et al. 2017a                                                 |
| <b>FAMILY Rhinonycteridae</b>          | 2/6 (3 tested; 3 not tested) | 250        |                                          |                                                            |                                                                                       |
| <b>Genus Cloeotis</b>                  | <b>0/1</b>                   | <b>0</b>   |                                          |                                                            |                                                                                       |
| Cloeotis percivali                     | -                            | -          |                                          |                                                            |                                                                                       |
| <b>Genus Paratriaenops</b>             | <b>0/3</b>                   | <b>32</b>  |                                          |                                                            |                                                                                       |
| Paratriaenops auritus                  | -                            | -          |                                          |                                                            |                                                                                       |
| Paratriaenops furculus                 | No                           | 32         | -                                        | Madagascar                                                 | Joffrin et al. 2020 Yes                                                               |
| Paratriaenops pauliani                 | -                            | -          |                                          |                                                            |                                                                                       |
| <b>Genus Triaenops</b>                 | <b>2/2</b>                   | <b>218</b> |                                          |                                                            |                                                                                       |
| Triaenops afer                         | Yes                          | 184        | AlphaCoV (Setracovirus); BetaCoV (Novel) | Kenya, Republic of the Congo, Tanzania, Mozambique         | Tao et al. 2017, Anthony et al. 2017a; Joffrin et al. 2020                            |
| Triaenops menamena                     | Yes                          | 34         | AlphaCoV (Setracovirus);                 | Madagascar                                                 | Joffrin et al. 2020 Yes                                                               |
| <b>FAMILY Megadermatidae</b>           | 1/2 (2 tested; 0 not tested) | 25         |                                          |                                                            |                                                                                       |
| <b>Genus Cardioderma</b>               | <b>1/1</b>                   | <b>21</b>  |                                          |                                                            |                                                                                       |
| Cardioderma cor                        | Yes                          | 21         | AlphaCoV (Novel)                         | Kenya                                                      | Tao et al. 2017, Tong et al. 2009                                                     |
| <b>Genus Lavia</b>                     | <b>0/1</b>                   | <b>4</b>   |                                          |                                                            |                                                                                       |
| Lavia frons                            | No                           | 4          | -                                        | Rwanda, Cameroon                                           | Nziza et al. 2019; Anthony et al. 2017a                                               |
| <b>FAMILY Rhinopomatidae</b>           | 0/3 (1 tested, 2 not tested) | 1          |                                          |                                                            |                                                                                       |
| <b>Genus Rhinopoma</b>                 | <b>0/3</b>                   | <b>1</b>   |                                          |                                                            |                                                                                       |
| Rhinopoma cystops                      | -                            | -          |                                          |                                                            |                                                                                       |
| Rhinopoma macinnesi                    | -                            | -          |                                          |                                                            |                                                                                       |
| Rhinopoma microphyllum                 | No                           | 1          | -                                        | Cameroon                                                   | Anthony et al. 2017a                                                                  |
| <b>FAMILY Myzopodidae</b>              | 0/2 (0 tested, 2 not tested) | 0          |                                          |                                                            |                                                                                       |
| <b>Genus Myzopoda</b>                  | <b>0/2</b>                   | <b>0</b>   |                                          |                                                            |                                                                                       |
| Myzopoda aurita                        | -                            | -          |                                          |                                                            | Yes                                                                                   |
| Myzopoda schliemanni                   | -                            | -          |                                          |                                                            |                                                                                       |
| <b>FAMILY Cistugonidae</b>             | 0/2 (0 tested; 2 not tested) | 0          |                                          |                                                            |                                                                                       |
| <b>Genus Cistugo</b>                   | <b>0/2</b>                   | <b>0</b>   |                                          |                                                            |                                                                                       |
| Cistugo lesueuri                       | -                            | -          |                                          |                                                            |                                                                                       |
| Cistugo seabrae                        | -                            | -          |                                          |                                                            |                                                                                       |

Table S5: Bat species from which coronavirus RNA have been reported (according to viruses identified)

| Genus                                                                              | Virus subgenus/clade possibly belonging to*                               | Relatedness/ greatest similarity to known species | Bat species                                                    | Country                           | Sample type                       | Number tested (percentage positive) | Reference                                             |
|------------------------------------------------------------------------------------|---------------------------------------------------------------------------|---------------------------------------------------|----------------------------------------------------------------|-----------------------------------|-----------------------------------|-------------------------------------|-------------------------------------------------------|
| Virus                                                                              | Duvinacovirus (HumanCoV-229E and related sequences from bat and camelids) | Similar to HumanCoV-229E                          | <i>Hipposideros abae</i>                                       | Ghana                             | Fecal                             | 19/242 (7.85%)                      | Corman et al. 2015                                    |
|                                                                                    |                                                                           |                                                   | <i>Hipposideros caffer</i>                                     | Kenya                             | Fecal                             | 4 <sup>#</sup>                      | Waruhiu et al. 2017                                   |
|                                                                                    |                                                                           |                                                   |                                                                | Cameroon                          | Rectal swab                       | 1/167 (0.6%)                        | Anthony et al. 2017a/ PREDICT1&2*                     |
|                                                                                    |                                                                           |                                                   |                                                                | Gabon                             | Rectal (& oral) swabs             | 3/859 (0.3%)                        | Anthony et al. 2017a/ PREDICT1&2*                     |
|                                                                                    |                                                                           |                                                   |                                                                | COG                               | Rectal (& oral) swabs             | 1/1 (100%)                          | Anthony et al. 2017a/ PREDICT1&2*                     |
|                                                                                    |                                                                           |                                                   |                                                                | Rwanda                            | Rectal (& oral) swabs             | 1/65 (1.5%)                         | Anthony et al. 2017a/ PREDICT1&2*                     |
|                                                                                    |                                                                           |                                                   |                                                                | Mozambique                        | Rectal swab                       | 10/59 (16.9%)                       | Joffrin et al. 2020                                   |
|                                                                                    |                                                                           |                                                   | <i>Hipposideros curtus</i>                                     | Cameroon                          | Rectal (& oral) swabs             | 1/7 (14.3%)                         | Anthony et al. 2017a/ PREDICT1&2*                     |
|                                                                                    |                                                                           |                                                   | <i>Hipposideros ruber</i>                                      | Ghana                             | Fecal                             | 5/59 (8.47%)                        | Pfefferle et al. 2009                                 |
|                                                                                    |                                                                           |                                                   |                                                                | Ghana                             | Fecal                             | 62/1611 (3.85%)                     | Corman et al. 2015                                    |
|                                                                                    |                                                                           |                                                   |                                                                | Gabon                             | Intestine                         | 2/387 (0.51%)                       | Maganga et al. 2014                                   |
|                                                                                    |                                                                           |                                                   |                                                                | Gabon                             | Intestine                         | 12/262 (5%)                         | Maganga et al. 2020                                   |
|                                                                                    |                                                                           |                                                   |                                                                | COG                               | Rectal swab                       | 1/8 (12.5%)                         | Anthony et al. 2017a/ PREDICT1&2*                     |
|                                                                                    |                                                                           |                                                   |                                                                | Cameroon                          | Rectal (& oral) swabs             | 37/674 (5.5%)                       | Anthony et al. 2017a/ PREDICT1&2*                     |
|                                                                                    |                                                                           |                                                   |                                                                | Uganda                            | Rectal (& oral) swabs             | 1/4 (25%)                           | Anthony et al. 2017a/ PREDICT1&2*                     |
|                                                                                    |                                                                           |                                                   |                                                                | Guinea                            | Rectal and oral swabs; Fecal      | 5/21 (23.8%)                        | Lecroix et al. 2020                                   |
|                                                                                    |                                                                           |                                                   | <i>Hipposideros sp.</i>                                        | Zimbabwe                          | Colony-collected fecal samples    | 7/123 (5.7%)                        | Bourgarel et al. 2018                                 |
|                                                                                    |                                                                           |                                                   |                                                                | Kenya                             | Fecal swabs                       | 16/68 (23.53%)                      | Tao et al. 2017                                       |
|                                                                                    |                                                                           |                                                   |                                                                | COG                               | Rectal swab                       | 1/9 (11.1%)                         | Anthony et al. 2017a/ PREDICT1&2*                     |
|                                                                                    |                                                                           |                                                   |                                                                | Cameroon                          | Rectal (& oral) swabs             | 1/2 (50%)                           | Anthony et al. 2017a/ PREDICT1&2*                     |
|                                                                                    |                                                                           |                                                   |                                                                | Uganda                            | Rectal (& oral) swabs             | 1/53 (1.9%)                         | Anthony et al. 2017a/ PREDICT1&2*                     |
|                                                                                    |                                                                           |                                                   | <i>Macronycteris vittatus</i> ( <i>Hipposideros vittatus</i> ) | Kenya                             | Fecal swabs                       | 1/123 (0.81%)                       | Tao et al. 2017                                       |
|                                                                                    |                                                                           |                                                   | <i>Macronycteris gigas</i> ( <i>Hipposideros gigas</i> )       | Gabon                             | Intestine                         | 1/156 (0.64%)                       | Maganga et al. 2020                                   |
|                                                                                    |                                                                           |                                                   | <i>Rhinolophus clivosus</i>                                    | Uganda                            | Rectal (& oral) swabs             | 1/39 (2.6%)                         | Anthony et al. 2017a/ PREDICT1&2*                     |
|                                                                                    | Setracovirus (HumanCoV-NL63 and related sequences from bats)              | Similar to HumanCoV-NL63                          | <i>Triaenops afer</i>                                          | Kenya                             | Fecal swabs                       | 8/30 (26.67%)                       | Tao et al. 2017                                       |
|                                                                                    |                                                                           |                                                   | Mozambique                                                     | Rectal swabs                      | 9/51 (17.6%)                      | Joffrin et al. 2020                 |                                                       |
|                                                                                    |                                                                           |                                                   | <i>Triaenops menamena</i>                                      | Madagascar                        | Intestine and rectal swabs        | 4/34 ()                             | Joffrin et al. 2020                                   |
|                                                                                    |                                                                           |                                                   | COG                                                            | Rectal swabs                      | 6/53 (11.3%)                      | Anthony et al. 2017a/ PREDICT1&2*   |                                                       |
|                                                                                    |                                                                           |                                                   | Tanzania                                                       | Rectal swabs                      | 42/50 (84%)                       | Anthony et al. 2017a/ PREDICT1&2*   |                                                       |
|                                                                                    |                                                                           |                                                   | <i>Mops condylurus</i>                                         | Tanzania                          | Rectal swabs                      | 1/220 (0.5%)                        | Anthony et al. 2017a/ PREDICT1&2*                     |
|                                                                                    |                                                                           |                                                   | <i>Cardioderma cor</i>                                         | Kenya                             | Fecal swabs                       | 1/13 (7.7%)                         | Anthony et al. 2017a/ PREDICT1&2*                     |
|                                                                                    |                                                                           |                                                   |                                                                | Kenya                             | Fecal swabs                       | 2/8 (25%)                           | Tao et al. 2017                                       |
|                                                                                    |                                                                           |                                                   | <i>Chaerephon pumilus</i>                                      | Kenya                             | Fecal swabs                       | 2/7 (28.6%)                         | Tong et al. 2009                                      |
|                                                                                    |                                                                           |                                                   |                                                                | Kenya                             | Fecal                             | 5 <sup>#</sup>                      | Waruhiu et al. 2017                                   |
|                                                                                    |                                                                           |                                                   |                                                                | Tanzania                          | Rectal (& oral) swabs             | 42/211 (19.9%)                      | Anthony et al. 2017a/ PREDICT1&2*                     |
|                                                                                    |                                                                           |                                                   |                                                                | COG                               | Rectal (& oral) swabs             | 5/62 (8.1%)                         | Anthony et al. 2017a/ PREDICT1&2*                     |
|                                                                                    |                                                                           |                                                   |                                                                | Rwanda                            | Rectal swab                       | 1/11 (9.09%)   1/19 (5.3%)          | Nziza et al. 2019   Anthony et al. 2017a/ PREDICT1&2* |
|                                                                                    | <i>Chaerephon pusillus</i>                                                | Mayotte                                           | Rectal swab                                                    | 7/60 (11.7%)                      | Joffrin et al. 2020               |                                     |                                                       |
|                                                                                    | <i>Chaerephon sp.</i>                                                     | Kenya                                             | Fecal swabs                                                    | Unspecified - up to 5/38          | Tong et al. 2009                  |                                     |                                                       |
|                                                                                    |                                                                           | Kenya                                             | Fecal swabs                                                    | 12/113 (10.6%)                    | Tao et al. 2017                   |                                     |                                                       |
|                                                                                    |                                                                           | DRC                                               | Rectal (& oral) swabs                                          | 2/6 (33.3%)                       | Anthony et al. 2017a/ PREDICT1&2* |                                     |                                                       |
|                                                                                    |                                                                           | Mayotte                                           | Feces                                                          | 1/4 (25%)                         | Joffrin et al. 2020               |                                     |                                                       |
|                                                                                    | <i>Eidolon helvum</i>                                                     | Cameroon                                          | Plasma                                                         | 2/302 (0.7%)                      | Anthony et al. 2017a/ PREDICT1&2* |                                     |                                                       |
|                                                                                    | <i>Epomops franqueti</i>                                                  | Cameroon                                          | Rectal (& oral) swabs                                          | 1/241 (0.4%)                      | Anthony et al. 2017a/ PREDICT1&2* |                                     |                                                       |
|                                                                                    | COG                                                                       | Rectal (& oral) swabs                             | 1/133 (0.8%)                                                   | Anthony et al. 2017a/ PREDICT1&2* |                                   |                                     |                                                       |
|                                                                                    | <i>Epomophorus labiatus</i>                                               | Kenya                                             | Fecal swabs                                                    | Unspecified - up to 9/35          | Tao et al. 2017                   |                                     |                                                       |
|                                                                                    | <i>Epomophorus gambianus</i>                                              | Cameroon                                          | Rectal (& oral) swabs                                          | 5/32 (15.6%)                      | Anthony et al. 2017a/ PREDICT1&2* |                                     |                                                       |
| <i>Hipposideros commersoni</i> ( <i>Macronycteris vittatus</i> / <i>M. gigas</i> ) | Cameroon                                                                  | Rectal (& oral) swabs                             | 2/51 (3.9%)                                                    | Anthony et al. 2017a/ PREDICT1&2* |                                   |                                     |                                                       |
| <i>Hipposideros gigas</i> ( <i>Macronycteris gigas</i> )                           | Cameroon                                                                  | Rectal (& oral) swabs                             | 13/112 (11.6%)                                                 | Anthony et al. 2017a/ PREDICT1&2* |                                   |                                     |                                                       |
|                                                                                    | COG                                                                       | Rectal (& oral) swabs                             | 1/3 (33.3%)                                                    | Anthony et al. 2017a/ PREDICT1&2* |                                   |                                     |                                                       |
| <i>Micropteropus pusillus</i>                                                      | Cameroon                                                                  | Liver, spleen                                     | 1/137 (0.7%)                                                   | Anthony et al. 2017a/ PREDICT1&2* |                                   |                                     |                                                       |

Novel/unclassified alphacoronaviruses

|                                  |                |                              |                            |                                        |
|----------------------------------|----------------|------------------------------|----------------------------|----------------------------------------|
| <i>Miniopterus africanus</i>     | Kenya          | Fecal swabs                  | 1/8 (12.5%)                | Tong et al. 2009                       |
|                                  | Kenya          | Fecal swabs                  | 7/12 (58.3%)               | Tong et al. 2009                       |
| <i>Miniopterus inflatus</i>      | Kenya          | Fecal swabs                  | 1/2 (50%)                  | Tao et al. 2017                        |
|                                  | COG            | Rectal (& oral) swabs        | 5/6 (83.3%)                | Anthony et al. 2017a/ PREDICT1&2*      |
|                                  | Kenya          | Fecal swabs                  | 1/13 (7.7%)                | Tong et al. 2009                       |
| <i>Miniopterus minor</i>         | Kenya          | Fecal swabs                  | 66/292 (22.6%)             | Tao et al. 2017                        |
|                                  | Kenya          | Fecal                        | 5 <sup>#</sup>             | Waruhiu et al. 2017                    |
| <i>Miniopterus mossambicus</i>   | Mozambique     | Rectal swabs                 | 4/21 (19%)                 | Joffrin et al. 2020                    |
|                                  | South Africa   | Fecal/ rectal specimens      | 1/14 (7.14%)               | Geldenhuys et al. 2013                 |
| <i>Miniopterus natalensis</i>    | Kenya          | Fecal swabs                  | 1/7 (14.3%)                | Tong et al. 2009                       |
|                                  | Kenya          | Fecal swabs                  | 9/53 (17%)                 | Tao et al. 2017                        |
| <i>Miniopterus sp.</i>           | Kenya          | Fecal swabs                  | 18/300 (6%)                | Tao et al. 2017                        |
|                                  | Rwanda         | Rectal (& oral) swabs        | 1/1 (100%)                 | Anthony et al. 2017a/ PREDICT1&2*      |
| <i>Megaloglossus woermanni</i>   | Cameroon       | Liver, rectal (& oral) swabs | 2/184 (1.1%)               | Anthony et al. 2017a/ PREDICT1&2*      |
| <i>Myonycteris angolensis</i>    | Guinea         | Rectal swabs                 | 1/42 (2.4%)                | Lecroix et al. 2020                    |
|                                  | Kenya          | Fecal                        | 3 <sup>#</sup>             | Waruhiu et al. 2017                    |
| <i>Mops condylurus</i>           | Cameroon       | Rectal (& oral) swabs        | 16/176 (9.6%)              | Nziza et al. 2019 Anthony et al. 2017a |
|                                  | DRC            | Rectal (& oral) swabs        | 7/104 (6.7%)               | Anthony et al. 2017a/ PREDICT1&2*      |
|                                  | Tanzania       | Rectal (& oral) swabs        | 105/220 (47.7%)            | Anthony et al. 2017a/ PREDICT1&2*      |
|                                  | Mozambique     | Rectal swabs                 | 11/54 (20.4%)              | Joffrin et al. 2020                    |
| <i>Mops midas</i>                | South Africa   | Fecal/ rectal specimens      | 1/2 (50%)                  | Geldenhuys et al. 2013                 |
|                                  | Madagascar     | Intestine and rectal swabs   | 4/21 (19%)                 | Joffrin et al. 2020                    |
| <i>Mormopterus acetabulosus</i>  | Reunion Island | Rectal swabs                 | 2/50 (4%)                  | Joffrin et al. 2020                    |
| <i>Mormopterus jugularis</i>     | Madagascar     | Intestine and rectal swabs   | 10/63 (15.9%)              | Joffrin et al. 2020                    |
| <i>Myotis punicus</i>            | Tunisia        | Fecal                        | 3/8 (37.5%)                | Ar Gouilh et al. 2018                  |
| <i>Myotis welwitschii</i>        | Uganda         | Rectal and oral swabs        | 2/256 (0.8%)               | Anthony et al. 2017a/ PREDICT1&2*      |
|                                  | South Africa   | Fecal/ rectal specimens      | 1/10 (10%)                 | Geldenhuys et al. 2013                 |
| <i>Neoromicia capensis</i>       | South Africa   | Fecal                        | 4/11 (36.4%)               | Ithete et al. 2013                     |
|                                  | South Africa   | Fecal/ rectal specimens      | 1/41 (2.44%)               | Geldenhuys et al. 2018                 |
|                                  | Kenya          | Fecal swabs                  | 2/19 (10.5%)               | Tong et al. 2009                       |
| <i>Otomops martinsseni</i>       | Kenya          | Fecal swabs                  | 10/35 (28.6%)              | Tao et al. 2017                        |
|                                  | Kenya          | Fecal                        | 22/150 (14.7%)             | Waruhiu et al. 2017                    |
|                                  | Rwanda         | Rectal (& oral) swabs        | 5/102 (4.9%)               | Anthony et al. 2017a/ PREDICT1&2*      |
| <i>Pipistrellus inexpectatus</i> | Cameroon       | Rectal (& oral) swabs        | 2/4 (50%)                  | Anthony et al. 2017a/ PREDICT1&2*      |
| <i>Rhinolophus alcyone</i>       | Cameroon       | Rectal (& oral) swabs        | 1/6 (16.7%)                | Anthony et al. 2017a/ PREDICT1&2*      |
| <i>Rhinolophus clivosus</i>      | Uganda         | Rectal (& oral) swabs        | 3/39 (7.7%)                | Anthony et al. 2017a/ PREDICT1&2*      |
| <i>Rhinolophus darlingi</i>      | Guinea         | Fecal                        | 2/5 (40%)                  | Lecroix et al. 2020                    |
| <i>Rhinolophus euryale</i>       | Morocco        | Fecal                        | 1/3 (33.3%)                | Ar Gouilh et al. 2018                  |
| <i>Rhinolophus hildebrandtii</i> | Kenya          | Fecal swabs                  | Unspecified - up to 5/16   | Tao et al. 2017                        |
| <i>Rhinolophus landeri</i>       | Kenya          | Fecal swabs                  | 7/58 (12.1%)               | Tao et al. 2017                        |
|                                  | Kenya          | Fecal                        | 1 <sup>#</sup>             | Waruhiu et al. 2017                    |
| <i>Rhinolophus lobatus</i>       | Mozambique     | Rectal swabs                 | 6/9 (66.7%)                | Joffrin et al. 2020                    |
| <i>Rhinolophus fumigatus</i>     | Kenya          | Fecal                        | 1 <sup>#</sup>             | Waruhiu et al. 2017                    |
| <i>Rhinolophus rhodesiae</i>     | Mozambique     | Rectal swabs                 | 9/30 (30%)                 | Joffrin et al. 2020                    |
|                                  | Kenya          | Fecal swabs                  | 13/45 (28.9%)              | Tao et al. 2017                        |
| <i>Rhinolophus sp.</i>           | Rwanda         | Rectal swabs                 | 1/23 (4.3%)                | Anthony et al. 2017a/ PREDICT1&2*      |
|                                  | Mozambique     | Rectal swabs                 | 1/2 (50%)                  | Joffrin et al. 2020                    |
|                                  | Kenya          | Fecal swabs                  | Unspecified - up to 10/20  | Tong et al. 2009                       |
| <i>Rousettus aegyptiacus</i>     | Kenya          | Fecal swabs                  | Unspecified - up to 18/397 | Tao et al. 2017                        |
|                                  | Tanzania       | Fecal                        | 1/453 (0.2%)               | Anthony et al. 2017a/ PREDICT1&2*      |
|                                  | Guinea         | Rectal and oral swabs        | 7/120 (5.8%)               | Lecroix et al. 2020                    |
| <i>Scotoecus sp.</i>             | Tanzania       | Fecal                        | 1/1 (100%)                 | Anthony et al. 2017a/ PREDICT1&2*      |
|                                  | Kenya          | Fecal swabs                  | 1/14 (7.14%)               | Tao et al. 2017                        |
| <i>Scotophilus dingani</i>       | Cameroon       | Rectal (& oral) swabs        | 1/12 (8.3%)                | Anthony et al. 2017a/ PREDICT1&2*      |
|                                  | DRC            | Rectal (& oral) swabs        | 1/31 (3.2%)                | Anthony et al. 2017a/ PREDICT1&2*      |
| <i>Scotophilus leucogaster</i>   | Cameroon       | Rectal (& oral) swabs        | 13/33 (39.4%)              | Anthony et al. 2017a/ PREDICT1&2*      |
| <i>Scotophilus nux</i>           | Cameroon       | Rectal swabs                 | 2/3 (66.7%)                | Anthony et al. 2017a/ PREDICT1&2*      |
| <i>Chaerephon sp.</i>            | Kenya          | Fecal swabs                  | 1/38 (2.63%)               | Tong et al. 2009                       |
| <i>Hipposideros caffer</i>       | Rwanda         | Rectal (& oral) swabs        | 1/65 (1.5%)                | Anthony et al. 2017a/ PREDICT1&2*      |

|                                                                                                            |                           |                                                                                    |              |                                   |                                |                                                       |
|------------------------------------------------------------------------------------------------------------|---------------------------|------------------------------------------------------------------------------------|--------------|-----------------------------------|--------------------------------|-------------------------------------------------------|
| Sarbecovirus subgenus (SARS-CoV and SARS-related viruses)                                                  | Similar to Human SARS-CoV | <i>Hipposideros ruber</i>                                                          | Rwanda       | Rectal swab                       | 1/2 (50%)                      | Nziza et al. 2019                                     |
|                                                                                                            |                           |                                                                                    | COG          | Rectal (& oral) swabs             | 1/8 (12.5%)                    | Anthony et al. 2017a/ PREDICT1&2*                     |
|                                                                                                            |                           |                                                                                    | Cameroon     | Rectal (& oral) swabs             | 11/674 (1.6%)                  | Anthony et al. 2017a/ PREDICT1&2*                     |
|                                                                                                            |                           | <i>Rhinolophus hildebrandtii</i>                                                   | Kenya        | Fecal swabs                       | Unspecified - up to 5/16       | Tao et al. 2017                                       |
|                                                                                                            |                           |                                                                                    | Rwanda       | Fecal                             | 2/7 (28.6%)                    | Markotter et al. 2019                                 |
|                                                                                                            |                           | <i>Rhinolophus clivosus</i>                                                        | Rwanda       | Rectal (& oral) swabs             | 3/24 (12.5%)                   | Nziza et al. 2019, Anthony et al. 2017a/ PREDICT1&2*  |
|                                                                                                            |                           |                                                                                    | Uganda       | Rectal (& oral) swabs             | 7/39 (17.9%)                   | Anthony et al. 2017a/ PREDICT1&2*                     |
|                                                                                                            |                           |                                                                                    | Kenya        | Fecal material                    | 1 <sup>#</sup>                 | Waruhiu et al. 2017                                   |
|                                                                                                            |                           | <i>Hipposideros coffer</i>                                                         | Rwanda       | Rectal swab                       | 1/16 (6.25%)   4/65 (6.2%)     | Nziza et al. 2019   Anthony et al. 2017a/ PREDICT1&2* |
|                                                                                                            |                           |                                                                                    | Cameroon     | rectal swab                       | 1/167 (0.6%)                   | Anthony et al. 2017a/ PREDICT1&2*                     |
| Hibecovirus subgenus (Bat coronaviruses; sister clade to Sarbecovirus)                                     | Similar to Hibecovirus    | <i>Hipposideros commersoni</i> ( <i>Macronycteris vitattus</i> / <i>M. gigas</i> ) | Tanzania     | Rectal (& oral) swabs             | 2/15 (13.3%)                   | Anthony et al. 2017a/ PREDICT1&2*                     |
|                                                                                                            |                           |                                                                                    | Nigeria      | Gastrointestinal tract            | 1 <sup>#</sup>                 | Quan et al. 2010                                      |
|                                                                                                            |                           |                                                                                    | Cameroon     | Oral and rectal swab              | 9/112 (9%)                     | Anthony et al. 2017a/ PREDICT1&2*                     |
|                                                                                                            |                           |                                                                                    | Gabon        | Intestine                         | 3/156 (1.92%)                  | Maganga et al. 2020                                   |
|                                                                                                            |                           | <i>Hipposideros ruber</i>                                                          | Ghana        | Fecal                             | 7/59 (11.86%)                  | Pfefferle et al. 2009                                 |
|                                                                                                            |                           |                                                                                    | Gabon        | Intestine                         | 1/387                          | Maganga et al. 2014                                   |
|                                                                                                            |                           |                                                                                    | Rwanda       | Rectal swab                       | 1/13 (7.7%)                    | Anthony et al. 2017a/ PREDICT1&2*                     |
|                                                                                                            |                           |                                                                                    | Guinea       | Rectal and oral swabs; Fecal      | 2/21 (9.5%)                    | Lecroix et al. 2020                                   |
|                                                                                                            |                           | <i>Hipposideros sp.</i>                                                            | Zimbabwe     | Colony-collected fecal samples    | 1/123 (0.81%)                  | Bourgarel et al. 2018                                 |
|                                                                                                            |                           | <i>Rhinolophus clivosus</i>                                                        | Rwanda       | Rectal swab                       | 1/24 (4.17%)                   | Nziza et al. 2019 Anthony et al. 2017a                |
|                                                                                                            |                           | <i>Myonycteris angolensis</i> ( <i>Lissonycteris angolensis</i> )                  | Rwanda       | Rectal swab                       | 3/6024 (5%)                    | Anthony et al. 2017a/ PREDICT1&2*                     |
| Merbecovirus subgenus (lineage C, includes MERS-related viruses as well as more distantly related viruses) | MERS-related species      | <i>Neoromicia capensis</i>                                                         | South Africa | Fecal                             | 1/11 (9.09%)                   | Ithete et al. 2013                                    |
|                                                                                                            |                           |                                                                                    | South Africa | Intestine                         | 1/41 (2.44%)                   | Geldenhuys et al. 2018                                |
|                                                                                                            |                           | <i>Pipistrellus hesperidus</i>                                                     | Uganda       | Rectal swab                       | 2/7 (28.2%)                    | Anthony et al. 2017b, PREDICT1&2*                     |
|                                                                                                            | Novel/unclassified        | <i>Nycteris cf. gambiensis</i>                                                     | Ghana        | Fecal                             | 46/185 (24.9%)                 | Annan et al. 2013                                     |
|                                                                                                            |                           | <i>Nycteris macrotis</i>                                                           | Guinea       | Fecal                             | 1/3 (33.3%)                    | Lecroix et al. 2020                                   |
|                                                                                                            |                           | <i>Nycteris thebaica</i>                                                           | Mozambique   | Rectal swabs                      | 4/14 (28.6%)                   | Joffrin et al. 2020                                   |
|                                                                                                            |                           | <i>Chaerephon sp.</i>                                                              | Kenya        | Fecal                             | Unspecified - up to 5/38       | Tong et al. 2009                                      |
|                                                                                                            |                           | <i>Eidolon dupreanum</i>                                                           | Madagascar   | Rectal swab                       | 1/96 (1.04%)                   | Razanajatovo et al. 2015                              |
|                                                                                                            |                           | <i>Eidolon helvum</i>                                                              | Kenya        | Fecal swabs                       | 6/10 (60%)                     | Tong et al. 2009                                      |
|                                                                                                            |                           |                                                                                    | Kenya        | Fecal                             | 28 <sup>#</sup>                | Waruhiu et al. 2017                                   |
|                                                                                                            |                           |                                                                                    | Kenya        | Fecal swabs                       | 38/181 (21%)                   | Tao et al. 2017                                       |
|                                                                                                            |                           |                                                                                    | Nigeria      | Fecal                             | 6/79 (7.6%)                    | Leopardi et al. 2016                                  |
|                                                                                                            |                           |                                                                                    | Cameroon     | Fecal                             | 13/24 pools (54%)              | Yinda et al. 2018                                     |
|                                                                                                            |                           |                                                                                    | Tanzania     | Rectal swabs                      | 413/1432 (28.8%)               | Anthony et al. 2017a/ PREDICT1&2*                     |
|                                                                                                            |                           |                                                                                    | Cameroon     | Rectal and oral swabs             | 15/302 (5%)                    | Anthony et al. 2017a/ PREDICT1&2*                     |
|                                                                                                            |                           |                                                                                    | COG          | Rectal (& oral) swabs             | 18/34 (52.9%)                  | Anthony et al. 2017a/ PREDICT1&2*                     |
|                                                                                                            |                           |                                                                                    | Rwanda       | Rectal swabs                      | 13/111 (11.71%)   31/221 (14%) | Nziza et al. 2019   Anthony et al. 2017a/ PREDICT1&2* |
|                                                                                                            |                           |                                                                                    | DRC          | Rectal (& oral) swabs             | 8/69 (11.6%)                   | Anthony et al. 2017a/ PREDICT1&2*                     |
|                                                                                                            |                           |                                                                                    | Guinea       | Rectal swabs                      | 4/9 (44.4%)                    | Lecroix et al. 2020                                   |
|                                                                                                            |                           | <i>Epomops franqueti</i>                                                           | Cameroon     | pooled spleen, liver, rectal swab | 3/241 (1.2%)                   | Anthony et al. 2017a/ PREDICT1&2*                     |
|                                                                                                            |                           |                                                                                    | DRC          | Rectal (& oral) swabs             | 13/98 (13.3%)                  | Anthony et al. 2017a/ PREDICT1&2*                     |
|                                                                                                            |                           |                                                                                    | COG          | Rectal (& oral) swabs             | 14/133 (10.5%)                 | Anthony et al. 2017a/ PREDICT1&2*                     |
|                                                                                                            |                           | <i>Epomophorus gambianus</i>                                                       | Cameroon     | Rectal (& oral) swabs             | 17/32 (53.1%)                  | Anthony et al. 2017a/ PREDICT1&2*                     |
|                                                                                                            |                           |                                                                                    | Guinea       | Rectal swabs and fecal            | 5/87 (5.7%)                    | Lecroix et al. 2020                                   |
|                                                                                                            |                           | <i>Epomophorus labiatus</i>                                                        | Kenya        | Fecal swabs                       | Unspecified - up to 9/35       | Tao et al. 2017                                       |
|                                                                                                            |                           |                                                                                    | Rwanda       | Rectal swab                       | 1/97 (1.03%)   2/94 (2.1%)     | Nziza et al. 2019   Anthony et al. 2017a/ PREDICT1&2* |
|                                                                                                            |                           | <i>Epomophorus wahlbergi</i>                                                       | Kenya        | Fecal swabs                       | 4/63 (6.4%)                    | Tao et al. 2017                                       |
|                                                                                                            |                           | <i>Epomophorus spp.</i>                                                            | Tanzania     | Rectal swabs                      | 3/47 (6.4%)                    | Anthony et al. 2017a/ PREDICT1&2*                     |
|                                                                                                            |                           | <i>Hipposideros commersoni</i> ( <i>Macronycteris vitattus</i> / <i>M. gigas</i> ) | Kenya        | Fecal                             | 1/10 (10%)                     | Tong et al. 2009                                      |
|                                                                                                            |                           |                                                                                    | Cameroon     | Rectal (& oral) swabs             | 5 <sup>#</sup>                 | Anthony et al. 2017a/ PREDICT1&2*                     |
|                                                                                                            |                           | <i>Meaenoglossus woermanni</i>                                                     | DRC          | Rectal (& oral) swabs             | 8/61 (13.1%)                   | Anthony et al. 2017a/ PREDICT1&2*                     |

|                                          |                                                  |                                   |            |                                    |                              |                                                       |
|------------------------------------------|--------------------------------------------------|-----------------------------------|------------|------------------------------------|------------------------------|-------------------------------------------------------|
| Nobecovirus subgenus (bat coronaviruses) | Similar to HKU9 and CMR704 species/ unclassified | <i>Megaderma</i>                  | COG        | Rectal (& oral) swabs              | 3/95 (3.2%)                  | Anthony et al. 2017a/ PREDICT1&2*                     |
|                                          |                                                  | <i>Micropteropus pusillus</i>     | Cameroon   | Rectal (& oral) swabs              | 7/184 (3.8%)                 | Anthony et al. 2017a/ PREDICT1&2*                     |
|                                          |                                                  |                                   | CAF        | Lung                               | 2/533 (0.38%)                | Maganga et al. 2014                                   |
|                                          |                                                  |                                   | Cameroon   | Rectal (& oral) swabs              | 7 <sup>#</sup>               | Anthony et al. 2017a/ PREDICT1&2*                     |
|                                          |                                                  | <i>Mops condylurus</i>            | DRC        | Pooled liver, spleen, rectal swabs | 42/520 (8.1%)                | Anthony et al. 2017a/ PREDICT1&2*                     |
|                                          |                                                  |                                   | COG        | Rectal (& oral) swabs              | 5/55 (9.1%)                  | Anthony et al. 2017a/ PREDICT1&2*                     |
|                                          |                                                  |                                   | Cameroon   | Rectal swabs                       | 2/176 (1.2%)                 | Anthony et al. 2017a/ PREDICT1&2*                     |
|                                          |                                                  | <i>Myonycteris angolensis</i>     | COG        | Rectal (& oral) swabs              | 1/1 (100%)                   | Anthony et al. 2017a/ PREDICT1&2*                     |
|                                          |                                                  |                                   | Tanzania   | Rectal (& oral) swabs              | 1/220 (0.5%)                 | Anthony et al. 2017a/ PREDICT1&2*                     |
|                                          |                                                  |                                   | Rwanda     | Rectal swabs                       | 1/45 (2.22%)                 | Nziza et al. 2019, Anthony et al. 2017a/ PREDICT1&2*  |
|                                          |                                                  | <i>Myonycteris torquata</i>       | Guinea     | Rectal swabs                       | 2/42 (4.76%)                 | Lecroix et al. 2020                                   |
|                                          |                                                  | <i>Myonycteris spp.</i>           | Cameroon   | Rectal swabs                       | 1/37 (2.7%)                  | Anthony et al. 2017a/ PREDICT1&2*                     |
|                                          |                                                  |                                   | DRC        | Pooled liver, spleen, rectal swabs | 1/1 (100%)                   | Anthony et al. 2017a/ PREDICT1&2*                     |
|                                          |                                                  | <i>Nanonycteris veldkampii</i>    | COG        | Rectal (& oral) swabs              | 3/3 (100%)                   | Anthony et al. 2017a/ PREDICT1&2*                     |
|                                          |                                                  | <i>Pipistrellus deserti</i>       | Guinea     | Rectal swabs                       | 1/1 (100%)                   | Lecroix et al. 2020                                   |
|                                          |                                                  | <i>Pteropus rufus</i>             | Egypt      | Liver                              | 1/31 <sup>1</sup> (3.26%)    | Shehata et al. 2016                                   |
|                                          |                                                  | <i>Rousettus aegyptiacus</i>      | Madagascar | Rectal swab                        | 13/76 (17.1%)                | Razanajatovo et al. 2015                              |
|                                          |                                                  |                                   | Egypt      | Oral, rectal, lung, Liver          | 17/257 (6.62%)               | Shehata et al. 2016                                   |
|                                          |                                                  |                                   | Kenya      | Fecal                              | 10 <sup>#</sup>              | Waruhiu et al. 2017                                   |
|                                          |                                                  |                                   | Kenya      | Fecal swabs                        | Unspecified - up to 10/20    | Tong et al. 2009                                      |
|                                          |                                                  |                                   | Kenya      | Fecal swabs                        | Unspecified - up to 18/397   | Tao et al. 2017                                       |
|                                          |                                                  |                                   | Cameroon   | spleen, liver, rectal swabs        | 9/201 (4.5%)                 | Anthony et al. 2017a/ PREDICT1&2*                     |
|                                          |                                                  |                                   | Rwanda     | Rectal (& oral) swabs              | 4/36 (11.1%)   10/286 (3.5%) | Nziza et al. 2019   Anthony et al. 2017a/ PREDICT1&2* |
|                                          |                                                  |                                   | Tanzania   | Rectal (& oral) swabs              | 20/453 (4.4%)                | Anthony et al. 2017a/ PREDICT1&2*                     |
|                                          |                                                  |                                   | Guinea     | Rectal and oral swabs              | 5/120 (4.2%)                 | Lecroix et al. 2020                                   |
|                                          |                                                  | <i>Rousettus madagascariensis</i> | Madagascar | Rectal swabs                       | 6/45 (13.3%)                 | Joffrin et al. 2020                                   |
|                                          |                                                  | <i>Rhinolophus sp.</i>            | DRC        | Rectal (& oral) swabs              | 1/62 (1.6%)                  | Anthony et al. 2017a/ PREDICT1&2*                     |
|                                          |                                                  | <i>Scotophilus dinganii</i>       | Cameroon   | Rectal (& oral) swabs              | 2/12 (16.7%)                 | Anthony et al. 2017a/ PREDICT1&2*                     |
|                                          |                                                  | <i>Scotophilus leucogaster</i>    | Cameroon   | Rectal (& oral) swabs              | 2/33 (6.1%)                  | Anthony et al. 2017a/ PREDICT1&2*                     |
|                                          |                                                  | <i>Triaenops sp.</i>              | Tanzania   | Rectal swabs                       | 5/50 (10%)                   | Anthony et al. 2017a/ PREDICT1&2*                     |

Abbreviations: DRC - Democratic Republic of the Congo; COG - Republic of the Congo; CAF - Central African Republic

# Unspecified totals tested per species - Quan et al. 2010 and Waruhiu et al. 2017

\* Totals positive and numbers per species are not indicated in Anthony et al. 2017a; sample numbers were obtained from <https://www.healthmap.org/predict/> as "Predict 1 & 2 surveillance and test data"

| is used to separate sample numbers indicated in Nziza et al. 2019 based on PREDICT surveillance and the totals accessed via <https://www.healthmap.org/predict/> as "Predict 1 & 2 surveillance and test data"



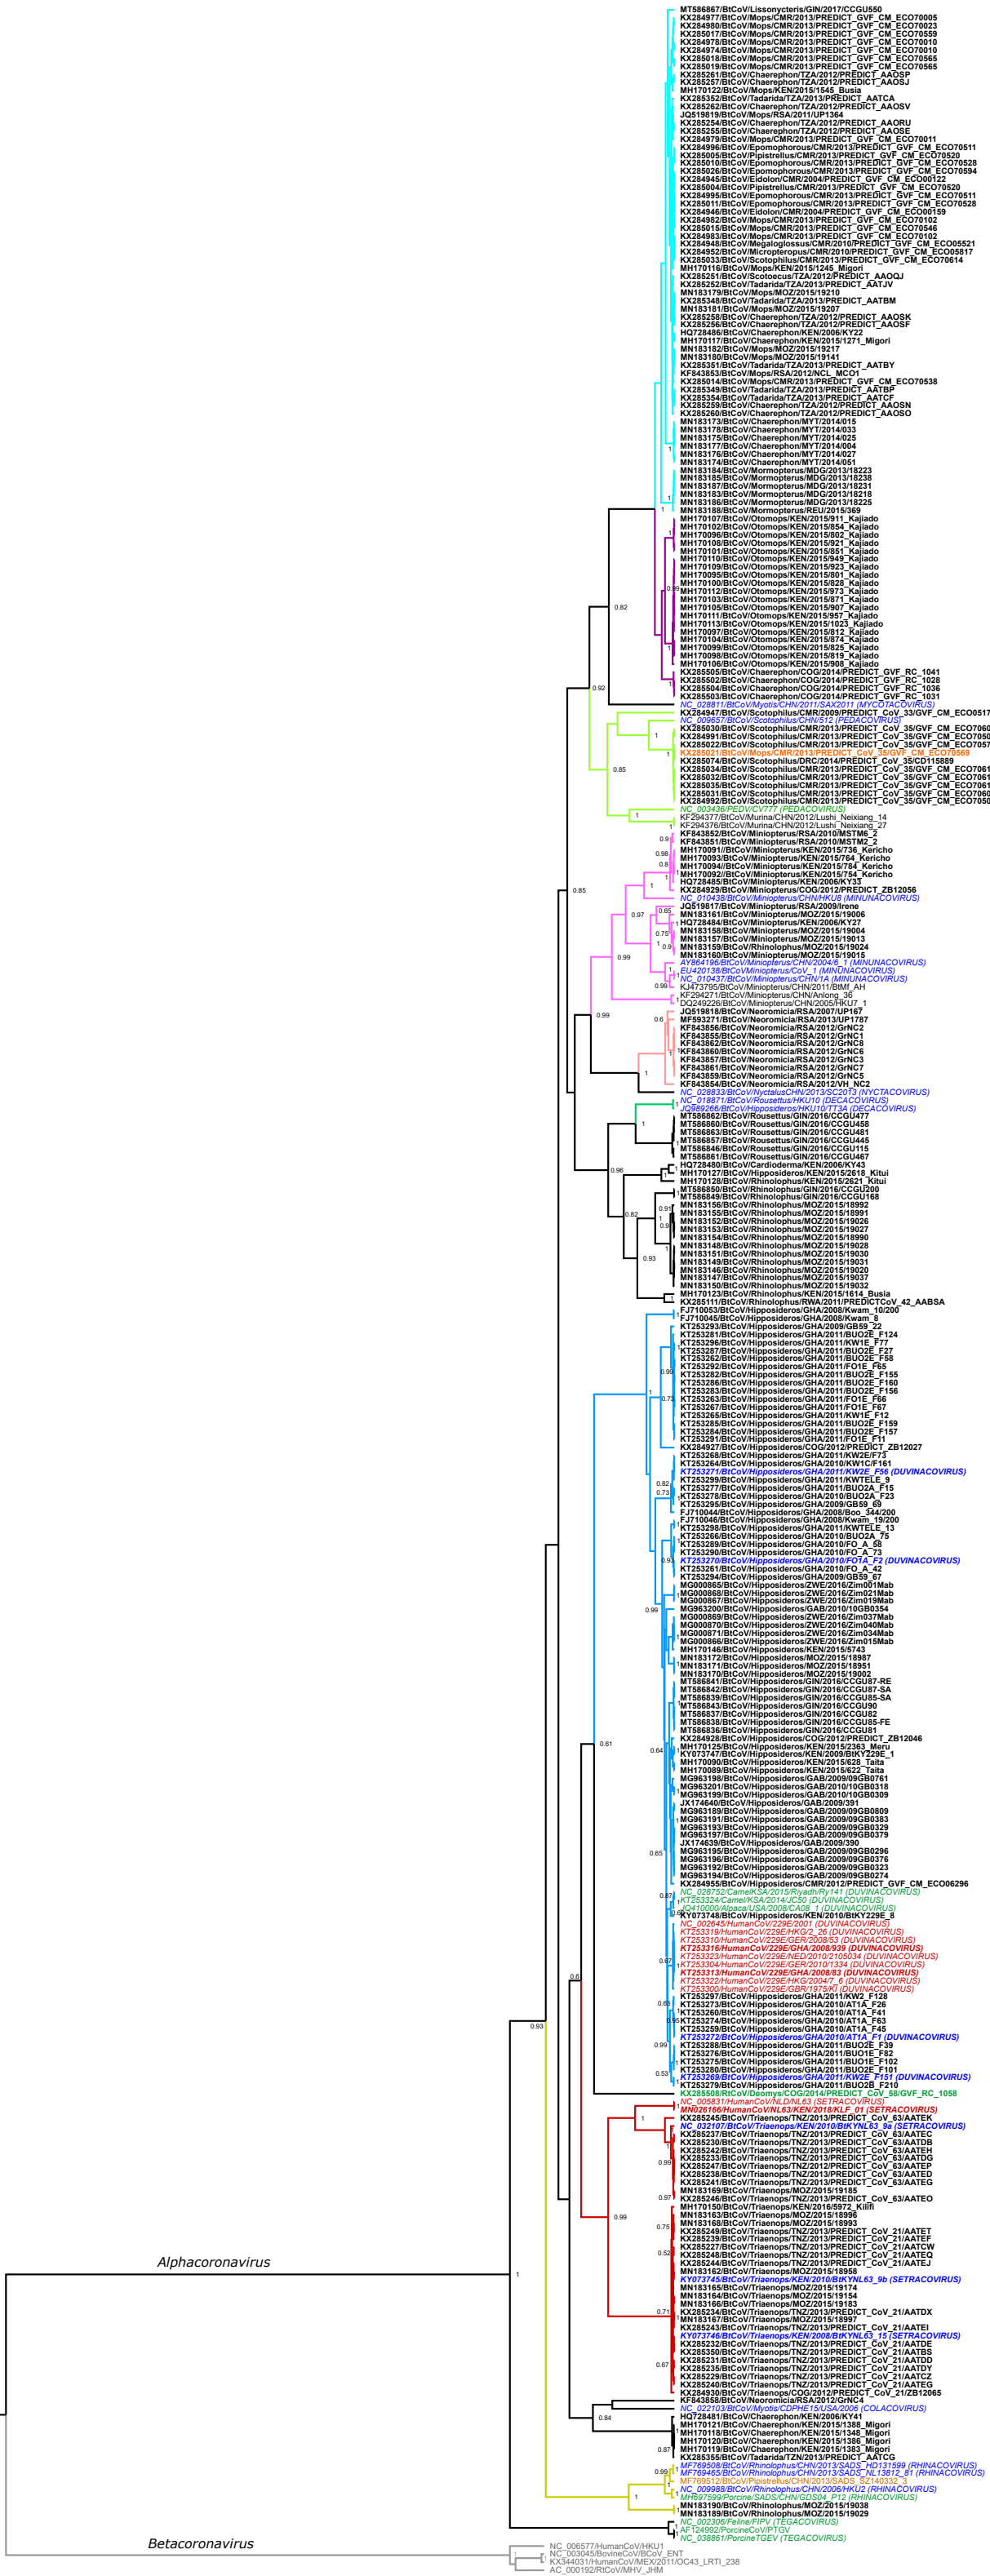

Figure S1



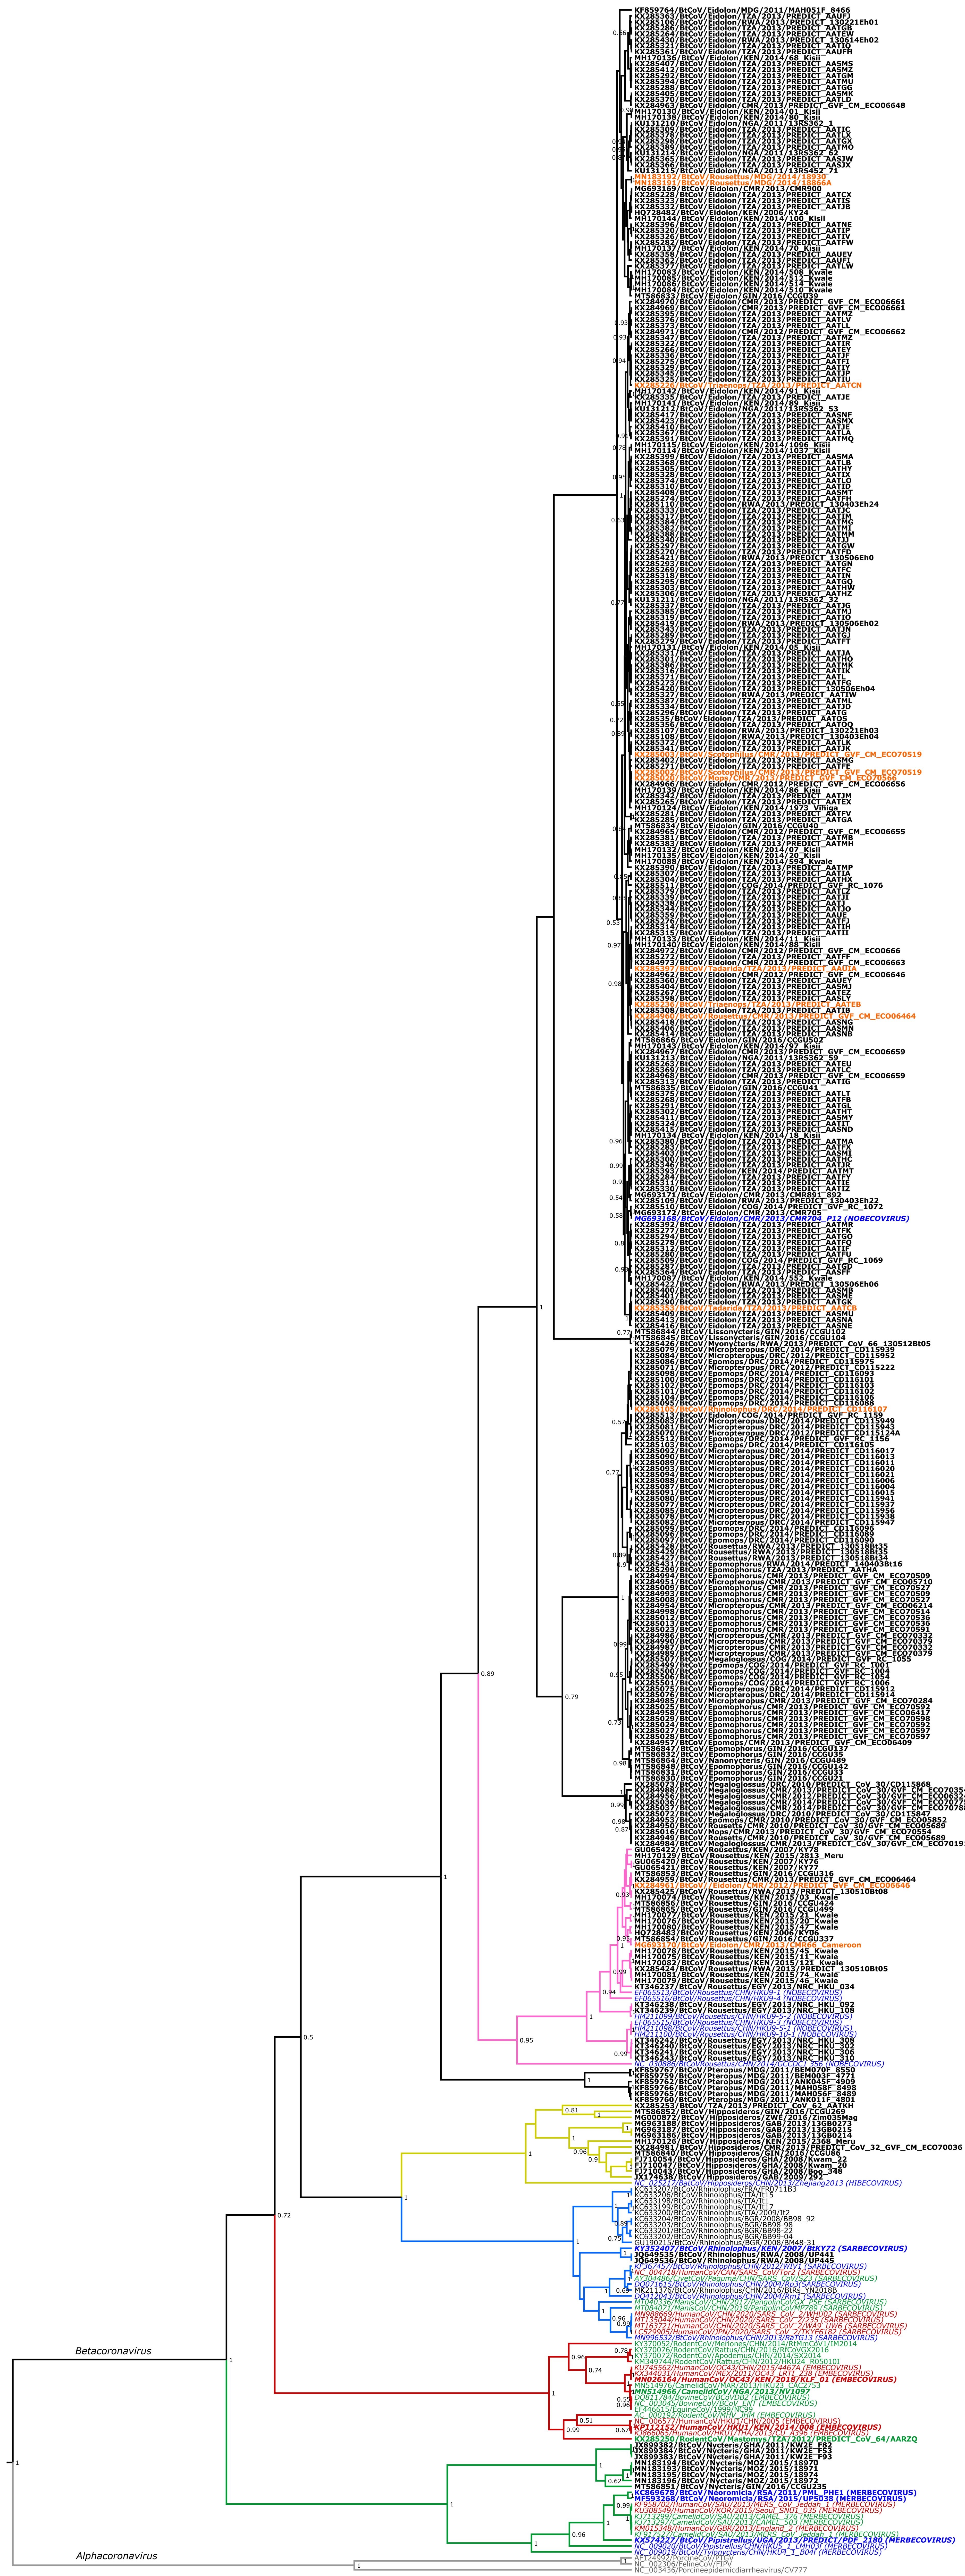

Supplement: s1 [file s1]
